# Supplementary material for: Other side of the coin for personalised medicine and healthcare: content analysis of ‘personalised’ practices in the literature
Source: PubMed Central journal article supplement — BMJ Open. 2016 Jul 13;6(7):e010243. doi: 10.1136/bmjopen-2015-010243 (PMC4947721; doi:10.1136/bmjopen-2015-010243), 2016-07-13
Supplement: bmjopen-2015-010243supp2.pdf [file bmjopen-2015-010243supp2.pdf]

# Supplementary material 2. Lists of practices identified.

---

*Tables S1 to S5 summarize the practices identified as a result of the systematic literature search.*

This file contains the tables which list, summarize and present the properties of the practices identified as a result of the systematic literature search. The articles referred in the tables are listed at the end under 'references'.

## List of tables:

|                                                                       |    |
|-----------------------------------------------------------------------|----|
| Table S1: Basic properties of included practices .....                | 2  |
| Table S2: Details of grouped practices and their references.....      | 10 |
| Table S3: Practices available in health care market (Category-1)..... | 12 |
| Table S4: Implementation models (Category-2).....                     | 14 |
| Table S5: Emerging practices (Category-3).....                        | 20 |
| References .....                                                      | 25 |

**Table S1: Basic properties of included practices**

| <b>P-no. †</b> | <b>Practices</b>                                                                                     | <b>Year first introduced ††</b>       | <b>Year first published</b> | <b>Main term(s) used</b>                           | <b>Primary article(s)</b>                                                   | <b>Other articles</b> | <b>Category (see table)</b>                                 |
|----------------|------------------------------------------------------------------------------------------------------|---------------------------------------|-----------------------------|----------------------------------------------------|-----------------------------------------------------------------------------|-----------------------|-------------------------------------------------------------|
| 1              | <b>Group: Pharmacogenetics (drug - gene)</b>                                                         | 2004 (6-Mercaptopurine and TPMT test) | 2005                        | personalized medicine; precision medicine          | Donnan 2011; Babic 2012; Cohen 2013; Faruki 2010; Mini 2012; Ritchie 2012   | See Table S2          | 1) Practices available in the health care market (Table S3) |
| 2              | <b>Group: Tumor genetics/ genomics tests and related drugs (individual drug - gene combinations)</b> | 1998 (trastuzumab and HercepTest)     | 2005                        | personalized medicine; precision medicine          | Andre 2013; Arnedos 2014; Bailey 2014; Cheng 2012; Donnelly 2013            | See Table S2          | 1) Practices available in the health care market (Table S3) |
| 3              | <b>Group: Adoptive T cell therapy for cancer</b>                                                     | 2007                                  | 2007                        | personalized medicine                              | June 2007                                                                   |                       | 3) Emerging practices (Table S5)                            |
| 4              | <b>Group: Tumor genomics - array of genes</b>                                                        | 2004 (OncotypeDx & MammaPrint)        | 2008                        | personalized medicine                              | Lee 2013; Arango 2013; van't Veer 2008                                      | See Table S2          | 1) Practices available in the health care market (Table S3) |
| 5              | <b>Group: Genetic tests for highly penetrant mutations</b>                                           | 1996 (BRCA1 and BRCA2)                | 2008                        | personalized medicine; personalized health care    | Meckley 2010; Philips 2008                                                  | See Table S2          | 1) Practices available in the health care market (Table S3) |
| 6              | <b>Group: Direct-to-consumer genomic tests ('personal genomics') (* and **)</b>                      | 2006                                  | 2009                        | personalized medicine; personalized health care    | Arribas-Ayllon 2011; Palmer 2012; Platt 2009; Richards 2010; Tenenbaum 2012 | See Table S2          | 1) Practices available in the health care market (Table S3) |
| 7              | <b>Group: Telemonitoring of implantable cardiac devices</b>                                          | 2010 (Biotronik)                      | 2011                        | personalized medicine; personalized care           | Heidbuchel 2011                                                             |                       | 1) Practices available in the health care market (Table S3) |
| 8              | <b>Group: Direct-to-consumer pharmacogenetic tests (* and **)</b>                                    | 2006                                  | 2012                        | personalized medicine                              | Chua 2012                                                                   |                       | 1) Practices available in the health care market (Table S3) |
| 9              | <b>Group: Smartphone-Based Personal, Pervasive Health Informatics Services</b>                       | 2012                                  | 2012                        | personalized health care; personal health services | Wac 2012                                                                    |                       | 3) Emerging practices (Table S5)                            |

| <b>P-no.†</b> | <b>Practices</b>                                                              | <b>Year first introduced ††</b> | <b>Year first published</b> | <b>Main term(s) used</b> | <b>Primary article(s)</b> | <b>Other articles</b>   | <b>Category (see table)</b>                                                                        |
|---------------|-------------------------------------------------------------------------------|---------------------------------|-----------------------------|--------------------------|---------------------------|-------------------------|----------------------------------------------------------------------------------------------------|
| 10            | Internet-based Personalised Healthcare Information (PHI) dissemination system | 2000                            | 2000                        | personalized health care | Abidi 2000                | Abidi 2001              | 3) Emerging practices (Table S5)                                                                   |
| 11            | Healthyme.md **                                                               | 2000                            | 2000                        | personalized health care | Thompson 2000             |                         | 1) Practices available in the health care market (Table S3)                                        |
| 12            | Coronary risk scores                                                          | 2003                            | 2003                        | personalized medicine    | Topol 2003                |                         | 1) Practices available in the health care market (Table S3)                                        |
| 13            | IT-based Diagnostic Instrumentation Systems                                   | 2005                            | 2005                        | personalized health care | Chun 2005                 |                         | 3) Emerging practices (Table S5)                                                                   |
| 14            | AmpliChip CYP450                                                              | 2004                            | 2005                        | personalized medicine    | de Leon 2006              | Jain 2005; Philips 2006 | 1) Practices available in the health care market (Table S3)                                        |
| 15            | Preventing Suicide Network (PSN) **                                           | 2005                            | 2005                        | personalized health care | Wang 2005                 |                         | 3) Emerging practices (Table S5)                                                                   |
| 16            | Mobile Ototoxicity Monitoring Instrumentation                                 | 2006                            | 2006                        | personalized health care | Ellingson 2006            |                         | 3) Emerging practices (Table S5)                                                                   |
| 17            | BiDil                                                                         | 2005                            | 2006                        | personalized medicine    | Hawkins-Taylor 2013       | Issa 2006; Meier 2012   | 1) Practices available in the health care market (Table S3)                                        |
| 18            | Pediatric Psychosocial Preventative Health Model (PPPHM)                      | 2005                            | 2006                        | systems medicine         | Kazak 2006                |                         | 3) Emerging practices (Table S5)                                                                   |
| 19            | Patient-Nutritionist social network                                           | 2009                            | 2009                        | personalized health care | Bonacina 2009             |                         | 3) Emerging practices (Table S5)                                                                   |
| 20            | Gentest                                                                       | 2007                            | 2009                        | personalized health care | Cesuroglu 2009            |                         | 1) Practices available in the health care market (Table S3);<br>2) Implementation model (Table S4) |

| <b>P-no.†</b> | <b>Practices</b>                                                  | <b>Year first introduced ††</b> | <b>Year first published</b> | <b>Main term(s) used</b>                             | <b>Primary article(s)</b> | <b>Other articles</b>                                             | <b>Category (see table)</b>                                 |
|---------------|-------------------------------------------------------------------|---------------------------------|-----------------------------|------------------------------------------------------|---------------------------|-------------------------------------------------------------------|-------------------------------------------------------------|
| 21            | Prostate cancer nomograms                                         | 1998                            | 2009                        | personalized medicine                                | Dotan 2009                |                                                                   | 1) Practices available in the health care market (Table S3) |
| 22            | Laboratory informatics solution for reporting of multiple myeloma | 2007                            | 2009                        | personalized medicine                                | Gundlapalli 2009          |                                                                   | 2) Implementation model (Table S4)                          |
| 23            | Sydney West Area Health Service - CYP450 testing                  | 2009                            | 2009                        | personalized medicine                                | Piatkov 2009              |                                                                   | 2) Implementation model (Table S4)                          |
| 24            | Ubiquitous Healthcare (U-Health)                                  | 2009                            | 2010                        | personalized health care; individualized health care | Chang 2010                |                                                                   | 2) Implementation model (Table S4)                          |
| 25            | CLIPMERGE PGx Program                                             | 2013                            | 2010                        | personalized medicine                                | Gottesman 2013            | Overby 2014; Overby 2010                                          | 2) Implementation model (Table S4)                          |
| 26            | Diabetes Connect - Center for Connected Health                    | 2009                            | 2010                        | personalized medicine                                | Jethwani 2010             | Agboola 2013                                                      | 2) Implementation model (Table S4)                          |
| 27            | Coriell Personalized Medicine Collaborative                       | 2007                            | 2010                        | personalized medicine                                | Keller 2010               | Gordon 2012; Gollust 2012; Schmidlen 2014; Stack 2011; Sweet 2014 | 2) Implementation model (Table S4)                          |
| 28            | GliomaPredict                                                     | 2010                            | 2010                        | personalized medicine                                | Li 2010                   |                                                                   | 3) Emerging practices (Table S5)                            |
| 29            | Multidisciplinary cancer clinic at Intermountain Health           | 2005                            | 2010                        | personalized medicine                                | Litton 2010               |                                                                   | 2) Implementation model (Table S4)                          |
| 30            | Genetic cancer risk assessment service                            | 2006                            | 2010                        | personalized medicine                                | Macdonald 2010            |                                                                   | 2) Implementation model (Table S4)                          |
| 31            | Ribavirin/pegylated interferon - Hepatitis C genotype             | 2004                            | 2010                        | personalized medicine                                | Meckley 2010              |                                                                   | 1) Practices available in the health care market (Table S3) |

| <b>P-no.†</b> | <b>Practices</b>                                                                       | <b>Year first introduced ††</b> | <b>Year first published</b> | <b>Main term(s) used</b>      | <b>Primary article(s)</b> | <b>Other articles</b>         | <b>Category (see table)</b>                                                                        |
|---------------|----------------------------------------------------------------------------------------|---------------------------------|-----------------------------|-------------------------------|---------------------------|-------------------------------|----------------------------------------------------------------------------------------------------|
| 32            | GeneInsight Suite                                                                      | 2004                            | 2011                        | personalized medicine         | Aronson 2011              |                               | 1) Practices available in the health care market (Table S3);<br>2) Implementation model (Table S4) |
| 33            | Geisinger blood component utilization programme                                        | 2004                            | 2011                        | personalized medicine         | Brown 2011                |                               | 2) Implementation model (Table S4)                                                                 |
| 34            | Personalised medicine in wound care                                                    | 2009                            | 2011                        | personalized medicine         | Dowd 2011                 |                               | 3) Emerging practices (Table S5)                                                                   |
| 35            | OurFamilyHealth                                                                        | 2010                            | 2011                        | personalized medicine         | Hulse 2011                |                               | 2) Implementation model (Table S4)                                                                 |
| 36            | Recon 1 (A global metabolic network reconstruction)                                    | 2011                            | 2011                        | personalized medicine         | Jamshidi 2011             |                               | 3) Emerging practices (Table S5)                                                                   |
| 37            | Personalized Systems Medicine Approach                                                 | 2011                            | 2011                        | personalized systems medicine | Kanodia 2011              |                               | 3) Emerging practices (Table S5)                                                                   |
| 38            | A surveillance tool to support quality assurance and research in personalized medicine | 2011                            | 2011                        | personalized medicine         | Khan 2011                 |                               | 2) Implementation model (Table S4)                                                                 |
| 39            | Genomic Medicine Model for primary care / MeTree                                       | 2009                            | 2011                        | personalized medicine         | Orlando 2013              | Orlando 2011;<br>Orlando 2014 | 2) Implementation model (Table S4)                                                                 |
| 40            | Data-modelling and visualisation in chronic kidney disease                             | 2001                            | 2011                        | personalized medicine         | Poh 2011                  |                               | 3) Emerging practices (Table S5)                                                                   |
| 41            | Michigan Oncology Sequencing Project (MI-ONCOSEQ)                                      | 2009                            | 2011                        | personalized medicine         | Roychowdhury 2011         |                               | 2) Implementation model (Table S4)                                                                 |
| 42            | Athlete Biological Passport                                                            | 2008                            | 2011                        | personalized medicine         | Sottas 2011               |                               | 2) Implementation model (Table S4)                                                                 |
| 43            | PreDx® Diabetes Risk Score (DRS) **                                                    | 2009                            | 2011                        | personalized medicine         | Towse 2013                | Sullivan 2011                 | 1) Practices available in the health care market (Table S3)                                        |

| <b>P-no.†</b> | <b>Practices</b>                                                                        | <b>Year first introduced ††</b> | <b>Year first published</b> | <b>Main term(s) used</b> | <b>Primary article(s)</b> | <b>Other articles</b> | <b>Category (see table)</b>                                 |
|---------------|-----------------------------------------------------------------------------------------|---------------------------------|-----------------------------|--------------------------|---------------------------|-----------------------|-------------------------------------------------------------|
| 44            | French National Cancer Institute's (French NCI) nationwide programme for tumor genomics | 2010                            | 2012                        | personalized medicine    | Andre 2012                | Lenz 2012             | 2) Implementation model (Table S4)                          |
| 45            | Next Generation Service Delivery Platform                                               | 2012                            | 2012                        | personalized health care | Andriopoulou 2012         |                       | 3) Emerging practices (Table S5)                            |
| 46            | Personal Genome Project                                                                 | 2006                            | 2012                        | personalized medicine    | Ball 2012                 |                       | 3) Emerging practices (Table S5)                            |
| 47            | Computer-Assisted Brief Intervention for Tobacco (CABIT) Program                        | 2008                            | 2012                        | personalized health care | Boudreaux 2012            |                       | 3) Emerging practices (Table S5)                            |
| 48            | Via Oncology Pathways                                                                   | 2005                            | 2012                        | personalized medicine    | Brufsky 2012              |                       | 2) Implementation model (Table S4)                          |
| 49            | My PREVENT™ Plan                                                                        | 2012                            | 2012                        | personalized health care | Burnette 2012             |                       | 2) Implementation model (Table S4)                          |
| 50            | integrative Personal Omics Profile (iPOP)                                               | 2011                            | 2012                        | personalized medicine    | Chen 2012                 | Li-Pook-Than 2013     | 3) Emerging practices (Table S5)                            |
| 51            | Coronary Heart Disease Risk Assessment (CHDRA)                                          | 2012                            | 2012                        | personalized medicine    | Cross 2012                |                       | 3) Emerging practices (Table S5)                            |
| 52            | Electronic health record - OntoKBFC                                                     | 2011                            | 2012                        | personalized medicine    | Jing 2012                 | 0                     | 3) Emerging practices (Table S5)                            |
| 53            | Interpretome                                                                            | 2011                            | 2012                        | personalized medicine    | Karczewski 2012           |                       | 1) Practices available in the health care market (Table S3) |
| 54            | Health Improvement and Management System (HIMS)                                         | 2012                            | 2012                        | personalized health care | Lee 2012                  |                       | 3) Emerging practices (Table S5)                            |
| 55            | My Cancer Genome™                                                                       | 2011                            | 2012                        | personalized medicine    | Printz 2012               |                       | 1) Practices available in the health care market (Table S3) |
| 56            | Next Generation Sequencing for cancer patients at Washington University                 | 2011                            | 2012                        | personalized medicine    | Printz 2012               |                       | 2) Implementation model (Table S4)                          |

| <b>P-no.†</b> | <b>Practices</b>                                                                                                                      | <b>Year first introduced ††</b> | <b>Year first published</b> | <b>Main term(s) used</b>                        | <b>Primary article(s)</b> | <b>Other articles</b>    | <b>Category (see table)</b>                                 |
|---------------|---------------------------------------------------------------------------------------------------------------------------------------|---------------------------------|-----------------------------|-------------------------------------------------|---------------------------|--------------------------|-------------------------------------------------------------|
| 57            | <b>PREDICT (Pharmacogenomic Resource for Enhanced Decisions in Care and Treatment)</b>                                                | 2010                            | 2012                        | personalized medicine                           | Pulley 2012               | Hartzler 2013; Lieb 2012 | 2) Implementation model (Table S4)                          |
| 58            | <b>MyHealthAtVanderbilt - FluTool</b>                                                                                                 | 2010                            | 2012                        | personalized health care                        | Rosenbloom 2012           |                          | 2) Implementation model (Table S4)                          |
| 59            | <b>Quantified-self</b>                                                                                                                | 2008                            | 2012                        | P4 medicine                                     | Smarr 2012                |                          | 3) Emerging practices (Table S5)                            |
| 60            | <b>Telemedicine for the Heart</b>                                                                                                     | 2007                            | 2012                        | personalized health care                        | Sohn 2012                 |                          | 2) Implementation model (Table S4)                          |
| 61            | <b>Lynch syndrome screening programme and clinical genetics services at Cleveland Clinic</b>                                          | 2011                            | 2012                        | personalized health care, personalized medicine | Teng 2012                 |                          | 2) Implementation model (Table S4)                          |
| 62            | <b>University of Florida (UF) Health Personalized Medicine Program (PMP)</b>                                                          | 2012                            | 2012                        | personalized medicine                           | Weitzel 2014              | Johnson 2012             | 2) Implementation model (Table S4)                          |
| 63            | <b>Surgeon General's Family Health History tool</b>                                                                                   | 2005                            | 2013                        | personalized medicine                           | Arar 2013                 |                          | 1) Practices available in the health care market (Table S3) |
| 64            | <b>Collaborative Assessment and Recommendation Engine (CARE)</b>                                                                      | 2013                            | 2013                        | personalized health care                        | Chawla 2013               |                          | 3) Emerging practices (Table S5)                            |
| 65            | <b>Gaussian process framework</b>                                                                                                     | 2012                            | 2013                        | personalized health care                        | Clifton 2013              |                          | 3) Emerging practices (Table S5)                            |
| 66            | <b>Clinical Pharmacogenomics Implementation Program at the University of Chicago</b>                                                  | 2013                            | 2013                        | personalized medicine; precision medicine       | Dolan 2013                | O'Donnel 2014            | 2) Implementation model (Table S4)                          |
| 67            | <b>Interdisciplinary model of care for cardiogenetics</b>                                                                             | 2013                            | 2013                        | personalized medicine                           | Erskine 2013              |                          | 2) Implementation model (Table S4)                          |
| 68            | <b>Coriell Personalized Medicine Collaborative - Pharmacogenomics Appraisal, Evidence Scoring and Interpretation System (PhAESIS)</b> | 2007                            | 2013                        | personalized medicine                           | Gharani 2013              | Huang 2013               | 2) Implementation model (Table S4)                          |

| <b>P-<br/>no.†</b> | <b>Practices</b>                                                                          | <b>Year first<br/>introduced<br/>††</b> | <b>Year first<br/>published</b> | <b>Main term(s)<br/>used</b>                  | <b>Primary<br/>article(s)</b> | <b>Other<br/>articles</b> | <b>Category (see<br/>table)</b>                             |
|--------------------|-------------------------------------------------------------------------------------------|-----------------------------------------|---------------------------------|-----------------------------------------------|-------------------------------|---------------------------|-------------------------------------------------------------|
| 69                 | The Oral-Systemic Personalized Medicine Model at Marshfield Clinic                        | 2013                                    | 2013                            | personalized medicine;<br>personalized health | Glurich 2013                  |                           | 2) Implementation model (Table S4)                          |
| 70                 | Gknowmix™ / Pathology-Supported Genetic Testing™                                          | 2013                                    | 2013                            | personalized medicine                         | Kotze 2013                    |                           | 1) Practices available in the health care market (Table S3) |
| 71                 | Individualized Medicine Clinic at Mayo Clinic                                             | 2012                                    | 2013                            | individualized medicine                       | Lazardis 2014                 | Farrugia 2013             | 2) Implementation model (Table S4)                          |
| 72                 | Pregnancy and Health Profile (PHP)                                                        | 2013                                    | 2013                            | personalized medicine                         | Lin 2013                      |                           | 3) Emerging practices (Table S5)                            |
| 73                 | P4 nutrigenetics                                                                          | 2013                                    | 2013                            | P4 medicine                                   | Lorenz 2013                   |                           | 1) Practices available in the health care market (Table S3) |
| 74                 | Pharmacogenetic Smoking Cessation Intervention                                            | 2010                                    | 2013                            | personalized medicine                         | McClure 2013                  |                           | 2) Implementation model (Table S4)                          |
| 75                 | The University of Texas MD Anderson Cancer Center experience with cancer genomics         | 2013                                    | 2013                            | personalized medicine                         | Meric-Bernstam 2013           |                           | 2) Implementation model (Table S4)                          |
| 76                 | Medtronic Reclaim Deep Brain Stimulation Therapy device for Obsessive Compulsive Disorder | 2010                                    | 2013                            | precision medicine                            | O'Rawe 2013                   |                           | 1) Practices available in the health care market (Table S3) |
| 77                 | WHOLE - Wellness and Health Omics Linked to the Environment                               | 2013                                    | 2013                            | personalized medicine                         | Patel 2013                    | Gibson 2014               | 2) Implementation model (Table S4)                          |
| 78                 | IAServ: An Intelligent Home Care Web Services Platform in a Cloud for Aging-in-Place      | 2013                                    | 2013                            | personalized health care                      | Su 2013                       |                           | 3) Emerging practices (Table S5)                            |
| 79                 | Testing for Viral Load Monitoring (VLM) and the Treatment of Hepatitis C                  | 2006                                    | 2013                            | personalized medicine                         | Towse 2013                    |                           | 1) Practices available in the health care market (Table S3) |
| 80                 | Health Coaching and Genomics                                                              | 2012                                    | 2013                            | personalized medicine                         | Vorderstasse 2013             |                           | 2) Implementation model (Table S4)                          |
| 81                 | Kaleidoscope model of diabetes care                                                       | 2014                                    | 2014                            | personalized health care                      | Barnard 2014                  |                           | 3) Emerging practices (Table S5)                            |



| <b>P-no.†</b> | <b>Practices</b>                                                                                    | <b>Year first introduced ††</b> | <b>Year first published</b> | <b>Main term(s) used</b> | <b>Primary article(s)</b> | <b>Other articles</b>        | <b>Category (see table)</b>                                 |
|---------------|-----------------------------------------------------------------------------------------------------|---------------------------------|-----------------------------|--------------------------|---------------------------|------------------------------|-------------------------------------------------------------|
| 82            | <b>Preemptive Pharmacogenomics at Mayo Clinic</b>                                                   | 2012                            | 2014                        | personalized medicine    | Bielinski 2014            | Farrugia 2013; Hartzler 2013 | 2) Implementation model (Table S4)                          |
| 83            | <b>Corus CAD by CardioDx</b>                                                                        | 2010                            | 2014                        | personalized medicine    | Herman 2014               |                              | 1) Practices available in the health care market (Table S3) |
| 84            | <b>ALGA-C (questionnaire that measures and collects psychocognitive information about patients)</b> | 2013                            | 2014                        | personalized medicine    | Kondylakis 2014           |                              | 3) Emerging practices (Table S5)                            |
| 85            | <b>A prototype for automated interpretation of genetic tests</b>                                    | 2014                            | 2014                        | individualized medicine  | Laerum 2014               |                              | 3) Emerging practices (Table S5)                            |
| 86            | <b>Youth Area for adolescent and young adult cancer patients</b>                                    | 2007                            | 2014                        | personalized medicine    | Mascarin 2014             |                              | 2) Implementation model (Table S4)                          |
| 87            | <b>A case of whole-exome sequencing from a prostate cancer bone metastasis biopsy</b>               | 2013                            | 2014                        | precision medicine       | van Allen 2014            |                              | 3) Emerging practices (Table S5)                            |
| 88            | <b>A Hybrid Mobile-Cloud Approach for ECG Telemonitoring</b>                                        | 2013                            | 2014                        | personalized health care | Wang 2014                 |                              | 3) Emerging practices (Table S5)                            |

† The practices are presented in the order of year first published. These numbers are used as identifier of each practice and referred with a “P-“ number in the text.

†† If indicated, the first year in which the practice is introduced is written. In cases where this is not available in the articles or the references of articles, the year article is submitted (if available) or published is written.

\* Known to have changed the content of the product/ service since the article included is published

\*\* Not active or in service anymore

**Table S2: Details of grouped practices and their references**

| <b>P-<br/>no.†</b> | <b>Practices</b>                                                                                                              | <b>Primary<br/>article</b> | <b>Other articles</b>                                                                                                                                                                                    |
|--------------------|-------------------------------------------------------------------------------------------------------------------------------|----------------------------|----------------------------------------------------------------------------------------------------------------------------------------------------------------------------------------------------------|
| <b>1</b>           | <b>Group: Pharmacogenetics (drug - gene)</b>                                                                                  |                            |                                                                                                                                                                                                          |
|                    | <b>Abacavir - HLA-B*5701</b>                                                                                                  | Cohen 2013                 | Guo 2013, Ritchie 2012, Towse 2013                                                                                                                                                                       |
|                    | <b>Clopidrogel - CYP2C19</b>                                                                                                  | Babic 2012                 | Gundert-Remy 2012; Hresko 2012; Sorich 2012; Towse 2013                                                                                                                                                  |
|                    | <b>Codeine - CYP2D6</b>                                                                                                       | Ritchie 2012               | Vaiopoulou 2013                                                                                                                                                                                          |
|                    | <b>Irinotecan - UGT1A1</b>                                                                                                    | Faruki 2010                | Andre 2013; Cohen 2013; Meckley 2010; Sorich 201                                                                                                                                                         |
|                    | <b>Mercaptopurine - TPMT</b>                                                                                                  | Donnan 2011                | Andre 2013; Gardiner 2005; Ritchie 2012; Vaiopoulou 2013                                                                                                                                                 |
|                    | <b>Tamoxifen - CYP2D6</b>                                                                                                     | Faruki 2010                | Andre 2013; Jiang 2010; Ruddy 2013                                                                                                                                                                       |
|                    | <b>Warfarin - CYP2C9/VKORC1</b>                                                                                               | Babic 2012                 | Cohen 2013; Gundert-Remy 2012; Hresko 2012; Meckley 2010; Ritchie 2012; Sorich 2012; Vaiopoulou 2013                                                                                                     |
|                    | <b>Pharmacogenetics in general</b>                                                                                            | Mini 2012                  |                                                                                                                                                                                                          |
| <b>2</b>           | <b>Group: Tumor genetics/ genomics tests and related drugs (individual drug – gene- disease combinations)</b>                 |                            |                                                                                                                                                                                                          |
|                    | <b>Crizotinib - EML4-ALK translocations - lung cancer</b>                                                                     | Donnelly 2013              | Ardini 2012; Andre 2012; Gundert-Remy 2012; Love 2012; Ong 2012; Ou 2012                                                                                                                                 |
|                    | <b>Gefitinib and erlotinib - EGFR - lung cancer</b>                                                                           | Dawe 2012                  | Faruki 2010; Andre 2013; Andre 2012; Cohen 2013; Merlin 2013; Nishimura 2012; Ong 2012; Towse 2013; Waring 2006                                                                                          |
|                    | <b>Imatinib - KIT, PDGFRA, SDHB and NF1 - GIS tumors</b>                                                                      | Andre 2013                 | Ely 2009                                                                                                                                                                                                 |
|                    | <b>Imatinib - Philedelphia (BCR-ABL), c-kit and PDGFRA mutations - CML</b>                                                    | Faruki 2010                | Andre 2013; Andre 2012; Cohen 2013; Gambacorti-Passerini 2008; Jiang 2010; Merlin 2013; Ong 2012; Towse 2013; Vaiopoulou 2013; Vizirianikis 2005                                                         |
|                    | <b>Panitumumab and cetuximab - KRAS/(EGFR?) - Colorectal cancer</b>                                                           | Faruki 2010                | Andre 2013; Andre 2012; Cohen 2013; Gundert-Remy 2012; Kelley 2011; Linardou 2011; Merlin 2013; Ong 2012; Shackelford 2012; Towse 2013; Vaiopoulou 2013                                                  |
|                    | <b>PML/RAR<math>\alpha</math> for all-trans-retinoic acid and arsenic trioxide treatment for acute promyelocytic leukemia</b> | Ong 2012                   |                                                                                                                                                                                                          |
|                    | <b>Trastuzumab - HER2 amplification - Breast and gastric centers</b>                                                          | Faruki 2010                | Andre 2013; Andre 2012; Cohen 2013; Ferrusi 2013; Gelmon 2008; Gundert-Remy 2012; Jiang 2010; Leopold 2013; Meckley 2010; Ong 2012; Philips 2006; Philips 2008; Towse 2013; Vaiopoulou 2013; Waring 2006 |
|                    | <b>Vemurafenib - BRAF mutation - myeloma</b>                                                                                  | Cheng 2012                 | Andre 2013; Arnedos 2014; Andre 2012; Bailey 2014; Love 2012; Ong 2012                                                                                                                                   |
|                    | <b>Tumor genomics in general</b>                                                                                              | Bailey 2014                | Mini 2012                                                                                                                                                                                                |
| <b>3</b>           | <b>Group: Adoptive T cell therapy for cancer</b>                                                                              |                            |                                                                                                                                                                                                          |
|                    | <b>CTL therapy, TIL therapy and engineered T cells</b>                                                                        | June 2007                  |                                                                                                                                                                                                          |

| <b>P-no.† Practices</b>                                                                                                                                                     | <b>Primary article</b> | <b>Other articles</b>                                                                                                   |
|-----------------------------------------------------------------------------------------------------------------------------------------------------------------------------|------------------------|-------------------------------------------------------------------------------------------------------------------------|
| <b>4 Group: Tumor genomics - array of genes</b>                                                                                                                             |                        |                                                                                                                         |
| <b>Oncotype DX</b>                                                                                                                                                          | Lee 2013               | Arango 2013; Hresko 2012; Jiang 2010; Kelley 2011; Meckley 2010; Towse 2013; Trosman 2010; van't Veer 2008; Weldon 2012 |
| <b>MammaPrint</b>                                                                                                                                                           | Arango 2013            | Cardoso 2007; Hresko 2012; Towse 2013; van't Veer 2008                                                                  |
| <b>Multigene signatures in general</b>                                                                                                                                      | van't Veer 2008        |                                                                                                                         |
| <b>5 Group: Genetic tests for highly penetrant mutations</b>                                                                                                                |                        |                                                                                                                         |
| <b>BRCA1/2 - Breast Cancer</b>                                                                                                                                              | Meckley 2010           | Weldon 2012                                                                                                             |
| <b>Lynch Syndrome</b>                                                                                                                                                       | Philips 2008           |                                                                                                                         |
| <b>6 Group: Direct-to-consumer genomic tests ('personal genomics')</b>                                                                                                      |                        |                                                                                                                         |
| <b>23andMe *</b>                                                                                                                                                            | Richards 2010          | Arribas-Ayllon 2011; Bartlett 2013; Chua 2012; Janssens 2011; Ng 2009; Palmer 2012; Tenenbaum 2012                      |
| <b>deCODEme **</b>                                                                                                                                                          | Arribas-Ayllon 2011    | Bartlett 2013; Palmer 2012; Richards 2010                                                                               |
| <b>Navigenics **</b>                                                                                                                                                        | Arribas-Ayllon 2011    | Bartlett 2013; Chua 2012; Ng 2009; Palmer 2012                                                                          |
| <b>DTC applications in general</b>                                                                                                                                          | Bartlett 2013          | Janssens 2011; Palmer 2012; Platt 2009; Tenenbaum 2012                                                                  |
| <b>7 Group: Direct-to-consumer pharmacogenetic tests</b>                                                                                                                    |                        |                                                                                                                         |
| <b>23andMe*; GenePlanet; Matrix Genomics**;<br/>Theranostics Lab</b>                                                                                                        | Chua 2012              |                                                                                                                         |
| <b>8 Group: Telemonitoring of implantable cardiac devices</b>                                                                                                               |                        |                                                                                                                         |
| <b>Biotronik- Home Monitoring System &amp;<br/>Cardiomessenger; Medtronic- Carelink; St. Jude<br/>Medical- Merlin.net &amp;merlin@home; Boston<br/>Scientific- Latitude</b> | Heidbuchel 2011        |                                                                                                                         |
| <b>9 Group: Smartphone-Based Personal, Pervasive Health Informatics Services</b>                                                                                            |                        |                                                                                                                         |
| <b>Various smartphone based applications</b>                                                                                                                                | Wac 2012               |                                                                                                                         |

† Numbering is based on Table S1. These numbers are used as identifier of each practice and referred with a “P-” number in the text.

\* Known to have changed the content of the product/ service since the article included is published

\*\* Not active or in service anymore

**Table S3: Practices available in health care market (Category-1)**

| <b>P- No.†</b> | <b>Practices</b>                                                                                     | <b>Setting: Provider</b>                                     | <b>Country</b>             | <b>Short description</b>                                                                                                                                                                                        | <b>Axis-2: Group served to</b>                            |
|----------------|------------------------------------------------------------------------------------------------------|--------------------------------------------------------------|----------------------------|-----------------------------------------------------------------------------------------------------------------------------------------------------------------------------------------------------------------|-----------------------------------------------------------|
| 1              | <b>Group: Pharmacogenetics (drug - gene)</b>                                                         | N/A                                                          | -                          | Group of genome-based test that predict individuals' response to certain drugs                                                                                                                                  | Health professional                                       |
| 2              | <b>Group: Tumor genetics/ genomics tests and related drugs (individual drug - gene combinations)</b> | N/A                                                          | -                          | Group of genome-based tests that predict response of tumor tissues to certain drugs                                                                                                                             | Health professional                                       |
| 4              | <b>Group: Tumor genomics - array of genes</b>                                                        | Oncotype Dx, MammaPrint                                      | USA, Netherlands           | Group of tests with an array of genome-based markers to predict the prognosis and response of tumor tissues to certain drugs                                                                                    | Health professional                                       |
| 5              | <b>Group: Genetic tests for highly penetrant mutations</b>                                           | N/A                                                          | -                          | Group of genetic tests for highly penetrant mutations to predict certain diseases                                                                                                                               | Individual (indirectly); Health professional              |
| 6              | <b>Group: Direct-to-consumer genomic tests ('personal genomics') (* and **)</b>                      | 23andMe*, Navigenics**, deCODEme**                           | USA                        | Group of direct-to-consumer genetic tests that identify predisposition to or predict risk of certain diseases                                                                                                   | Individual                                                |
| 7              | <b>Group: Telemonitoring of implantable cardiac devices</b>                                          | Biotronik; Medtronic; St. Jude Medical; Boston Scientific    | Germany, USA               | Group of implantable cardiac devices and systems required for their remote surveillance                                                                                                                         | Individual (indirectly); Health professional              |
| 8              | <b>Group: Direct-to-consumer pharmacogenetic tests (* and **)</b>                                    | 23andMe*; GenePlanet; Matrix Genomics**;<br>Theranostics Lab | USA, Slovenia, New Zealand | Group of direct-to-consumer genetic tests that predict individuals' response to certain drugs                                                                                                                   | Individual                                                |
| 11             | <b>Healthyme.md**</b>                                                                                | HealthyMe.md                                                 | USA                        | A web service which is an intermediary between the physicians in their private practices and the patients                                                                                                       | Individual; Health professional                           |
| 12             | <b>Coronary risk scores</b>                                                                          | -                                                            | -                          | Risk scoring tools for prediction of coronary artery disease                                                                                                                                                    | Individual (indirectly); Health professional              |
| 14             | <b>AmpliChip CYP450</b>                                                                              | Roche Diagnostics                                            | Switzerland                | A genome-based test with an array of markers to predict response to certain drugs                                                                                                                               | Health professional                                       |
| 17             | <b>BiDil</b>                                                                                         | Arbor Pharmaceuticals                                        | USA                        | A heart failure drug for African-American patients                                                                                                                                                              | Health professional                                       |
| 20             | <b>Gentest<sup>1</sup></b>                                                                           | GENAR Institute for Public Health and Genomics Research      | Turkey                     | An integrative preventive model that utilizes an individual's health information, family history, lifestyle factors, biomarkers and genotype to prevent chronic complex diseases in a targeted way <sup>1</sup> | Individual; Health professional; Health care organization |

| <b>P- No.†</b> | <b>Practices</b>                                                         | <b>Setting: Provider</b>               | <b>Country</b> | <b>Short description</b>                                                                                                                                                     | <b>Axis-2: Group served to</b>                      |
|----------------|--------------------------------------------------------------------------|----------------------------------------|----------------|------------------------------------------------------------------------------------------------------------------------------------------------------------------------------|-----------------------------------------------------|
| 21             | Prostate cancer nomograms                                                | N/A                                    | -              | Tools that use several clinical variables to predict clinical outcome of prostate cancer patients                                                                            | Individual (indirectly); Health professional        |
| 31             | Ribavirin/ pegylated interferon - Hepatitis C genotype                   | N/A                                    | -              | A genome-based test to detect Hepatitis C genotype, in order to predict response to ribavirin therapy                                                                        | Health professional                                 |
| 32             | GeneInsight Suite <sup>2</sup>                                           | Partners HealthCare                    | USA            | A series of software applications for laboratories, clinics and the communication between them to streamline interpretation and management of genome-based data <sup>2</sup> | Health professional; Health care organization       |
| 43             | PreDx® Diabetes Risk Score (DRS) **                                      | PreDx                                  | USA            | A genome-based test with an array of markers and an algorithm to predict type 2 diabetes risk                                                                                | Health professional                                 |
| 53             | Interpretome                                                             | Stanford University School of Medicine | USA            | A web-based genome interpretation tool                                                                                                                                       | Individual; Health professional (indirectly)        |
| 55             | My Cancer Genome™                                                        | Vanderbilt-Ingram Cancer Center        | USA            | An online cancer therapy decision support tool                                                                                                                               | Individual (recently added, *); Health professional |
| 63             | Surgeon General's Family Health History tool                             | US Surgeon General                     | USA            | A web-based tool to collect, organize and present family health history                                                                                                      | Individual                                          |
| 70             | Gknowmix™ / Pathology-Supported Genetic Testing™                         | Gnowmix Ltd.                           | South Africa   | A service delivery system and computer based tool for genetic test interpretation and reporting, using a database and expert knowledge                                       | Health professional                                 |
| 73             | P4 nutrigenetics                                                         | PharmGenomics GmbH                     | Germany        | A genetic test based on an array of markers to detect nutritional intolerances                                                                                               | Individual (indirectly); Health professional        |
| 79             | Testing for Viral Load Monitoring (VLM) and the Treatment of Hepatitis C | -                                      | -              | Testing for monitoring viral load of Hepatitis C to assess and predict response to therapy                                                                                   | Health professional                                 |
| 83             | Corus CAD by CardioDx                                                    | Corus CAD; CardioDx                    | USA            | A gene expression test on an array of genes to improve prediction of coronary artery disease risk                                                                            | Health professional                                 |

† Numbering is based on Table S1. These numbers are used as identifier of each practice and referred with a “P-” number in the text.

\* Known to have changed the content of the product/ service since the article included is published ; \*\* Not active or in service anymore

<sup>1</sup> Gentest was reported to be implemented in two facets: as a health practice to individuals via authorized practitioners, which continues today, and as an implementation model at GENAR's relevant center, which is not active anymore\*\*.

<sup>2</sup> GeneInsight started as an implementation model in one institution but now it is available for others as well.

**Table S4: Implementation models (Category-2)**

| <b>P-<br/>No.†</b> | <b>Practices</b>                                                         | <b>Setting:<br/>Institution<br/>implemented</b>         | <b>Country</b> | <b>Short description</b>                                                                                                                                                                                                                                                                                                   | <b>Axis-2: Group served<br/>to</b>                                     |
|--------------------|--------------------------------------------------------------------------|---------------------------------------------------------|----------------|----------------------------------------------------------------------------------------------------------------------------------------------------------------------------------------------------------------------------------------------------------------------------------------------------------------------------|------------------------------------------------------------------------|
| 20                 | <b>Gentest **<sup>1</sup></b>                                            | GENAR Institute for Public Health and Genomics Research | Turkey         | An integrative preventive model that utilizes an individual's health information, lifestyle factors, biomarkers and genotype to prevent chronic complex diseases in a targeted way is developed and implemented on individuals at GENAR's relevant center.** <sup>1</sup>                                                  | Individual; Health professional; Health care organization              |
| 22                 | <b>Laboratory informatics solution for reporting of multiple myeloma</b> | University of Utah School of Medicine                   | USA            | A reporting framework which provided the clinicians with composite results of the biomarkers used for myeloma patients is developed and implemented.                                                                                                                                                                       | Health professional; Health care organization                          |
| 23                 | <b>Sydney West Area Health Service - CYP450 testing</b>                  | Sydney West Area Health Service                         | Australia      | A laboratory provides on demand pharmacogenetic testing service within 24 hours to medical practices (hospitals, clinics, etc.) in a certain region.                                                                                                                                                                       | Health professional; Health care organization                          |
| 24                 | <b>Ubiquitous Healthcare (U-Health)</b>                                  | National Taiwan University Hospital                     | Taiwan         | A home healthcare service and sensors network is combined into a service system to continually provide health care service to patients who live in remote areas. It is offered to patients discharged from the hospital or hospice care and patients suffering from chronic diseases including cardiovascular diseases.    | Individual; Health professional (indirectly); Health care organization |
| 25                 | <b>CLIPMERGE PGx Program</b>                                             | Mount Sinai Medical Center                              | USA            | Patients enrolled are provided pharmacogenetic testing preemptively, i.e. before the relevant drug is indicated. A clinical decision support system is integrated to the existing work processes to deliver guidance on actionable results.                                                                                | Health professional; Health care organization                          |
| 26                 | <b>Diabetes Connect - Center for Connected Health</b>                    | Partners HealthCare                                     | USA            | In this programme, type 2 diabetic patients upload their blood glucose readings using their own glucometer through landline. The data is visible on a web-portal to patient and physician, who can also communicate with each other there. The physician can recommend on medical and lifestyle management of the disease. | Individual; Health professional; Health care organization (indirectly) |

| <b>P-<br/>No.†</b> | <b>Practices</b>                                                                     | <b>Setting:<br/>Institution<br/>implemented</b>                                                                                                   | <b>Country</b> | <b>Short description</b>                                                                                                                                                                                                                                                                                                                                            | <b>Axis-2: Group served<br/>to</b>                                                |
|--------------------|--------------------------------------------------------------------------------------|---------------------------------------------------------------------------------------------------------------------------------------------------|----------------|---------------------------------------------------------------------------------------------------------------------------------------------------------------------------------------------------------------------------------------------------------------------------------------------------------------------------------------------------------------------|-----------------------------------------------------------------------------------|
| 27                 | <b>Coriell Personalized<br/>Medicine Collaborative -<br/>Common complex diseases</b> | Coriell Personalized<br>Medicine<br>Collaborative, via U.S.<br>Air Force, Ohio State<br>University Medical<br>Center, Fox Chase<br>Medical Center | USA            | Three groups of individuals, community, cancer and chronic disease cohorts, are enrolled in the programme. Individuals provide a detailed medical history and DNA test is carried out on predefined variants. Risk reports for actionable health conditions are provided them with a web interface.                                                                 | Individual; Health professional (optional); Health care organization (indirectly) |
| 29                 | <b>Multidisciplinary cancer<br/>clinic at Intermountain<br/>Health</b>               | Intermountain<br>Healthcare                                                                                                                       | USA            | A multidisciplinary clinic is established to provide coordinated and comprehensive treatment planning in a single visit for cancer patients.                                                                                                                                                                                                                        | Individual; Health care organization                                              |
| 30                 | <b>Genetic cancer risk<br/>assessment service</b>                                    | City of Hope<br>Comprehensive<br>Cancer Center                                                                                                    | USA            | Genetic cancer risk assessment services are provided not only at the academic medical center but also to a larger community through Cancer Screening and Prevention Program Network.                                                                                                                                                                                | Individual (indirectly); Health professional; Health care organization            |
| 32                 | <b>GeneInsight Suite<sup>2</sup></b>                                                 | Partners HealthCare                                                                                                                               | USA            | A series of software applications for laboratories, clinics and the communication between them to streamline interpretation and management of genome-based data is developed and implemented. <sup>2</sup>                                                                                                                                                          | Health professional; Health care organization                                     |
| 33                 | <b>Geisinger blood component<br/>utilization programme</b>                           | Geisinger Medical<br>Center                                                                                                                       | USA            | In order to reduce unnecessary blood component utilization for patients undergoing surgery, algorithms are developed to clarify when and which blood components to use. A system is set for communication between the pathologist and the patients' clinical team 7/24, involving clinical pathologist when too much blood components are used for a given patient. | Health professional; Health care organization                                     |
| 35                 | <b>OurFamilyHealth</b>                                                               | Intermountain<br>Healthcare                                                                                                                       | USA            | A patient-facing family health history tool is developed and introduced. It is accessible via a personal health record site to patients and also linked to their electronic health record.                                                                                                                                                                          | Individual; Health professional (indirectly); Health care organization            |

| <b>P-<br/>No.†</b> | <b>Practices</b>                                                                               | <b>Setting:<br/>Institution<br/>implemented</b>                           | <b>Country</b> | <b>Short description</b>                                                                                                                                                                                                                                                                            | <b>Axis-2: Group served<br/>to</b>                                                  |
|--------------------|------------------------------------------------------------------------------------------------|---------------------------------------------------------------------------|----------------|-----------------------------------------------------------------------------------------------------------------------------------------------------------------------------------------------------------------------------------------------------------------------------------------------------|-------------------------------------------------------------------------------------|
| 38                 | <b>A surveillance tool to support quality assurance and research in personalized medicine</b>  | Vanderbilt University<br>School of Medicine                               | USA            | A quality assurance tool for assessment of a service implemented, i.e. routine pharmacogenetic testing of patients preparing to undergo coronary angiography (preemptive pharmacogenetics), is developed and introduced.                                                                            | Health professional; Health care organization                                       |
| 39                 | <b>Genomic Medicine Model for primary care / MeTree</b>                                        | Duke University/<br>Moses Cone Health System                              | USA            | An internet based patient-facing family health history collection and clinical decision support tool is developed and implemented.                                                                                                                                                                  | Health professional; Health care organization                                       |
| 41                 | <b>Michigan Oncology Sequencing Project (MI-ONCOSEQ)</b>                                       | Michigan University                                                       | USA            | Advanced or refractory cancer patients' are provided tumor genomics testing (whole genome and exome sequencing). Based on the results, therapeutic possibilities are identified by a multidisciplinary team.                                                                                        | Health professional; Health care organization                                       |
| 42                 | <b>Athlete Biological Passport</b>                                                             | World Anti-Doping Agency, through local/national antidoping organizations | International  | Athletes are followed longitudinally to detect any changes in their hematologic and steroidal profiles. Recent large changes and disparities in the parameters indicate either doping or a medical condition.                                                                                       | Individuals; Other organization                                                     |
| 44                 | <b>French National Cancer Institute's (French NCI) nationwide programme for tumor genomics</b> | French National Cancer Institute (NCI)                                    | France         | French NCI and a network of 28 laboratories provide biomarker testing for all cancer patients in all clinics (tumor genomics). The programme is funded by the French NCI and the Ministry of Health.                                                                                                | Health professional; National health system                                         |
| 48                 | <b>Via Oncology Pathways</b>                                                                   | University of Pittsburgh Medical Center                                   | USA            | A clinical pathways programme was developed including algorithms for oncology clinical decision making and measuring the adherence to the algorithms.                                                                                                                                               | Health professional; Health care organization                                       |
| 49                 | <b>My PREVENT™ Plan</b>                                                                        | Duke University Medical Center / 'Just for Us' program                    | USA            | Within a home health care programme for disabled and elderly people, a service was developed for identification of patients' proximate and longer-term health risks and needs, chronic disease management, patient engagement and coordination of care, using the health profile of the individual. | Individual; Health professional; Health care organization                           |
| 56                 | <b>Next Generation Sequencing for cancer patients at Washington University</b>                 | Washington University                                                     | USA            | Next generation sequencing is offered to patients to test for mutations in certain genes in tumors to determine the most appropriate therapy (tumor genomics).                                                                                                                                      | Individual (indirectly); Health professional; Health care organization (indirectly) |



| <b>P-<br/>No.†</b> | <b>Practices</b>                                                                             | <b>Setting:<br/>Institution<br/>implemented</b>                   | <b>Country</b> | <b>Short description</b>                                                                                                                                                                                                                                                                                                                                                                     | <b>Axis-2: Group served<br/>to</b>                                                                 |
|--------------------|----------------------------------------------------------------------------------------------|-------------------------------------------------------------------|----------------|----------------------------------------------------------------------------------------------------------------------------------------------------------------------------------------------------------------------------------------------------------------------------------------------------------------------------------------------------------------------------------------------|----------------------------------------------------------------------------------------------------|
| 57                 | <b>PREDICT (Pharmacogenomic Resource for Enhanced Decisions in Care and Treatment)</b>       | Vanderbilt University School of Medicine                          | USA            | Identified patients, who were scheduled for coronary arteriography, is genotyped preemptively to predict the response to a drug which is likely to be prescribed after the arteriography. Clinically actionable results are integrated to the electronic medical record of the individuals to be used by the clinician, and a clinical decision support system is developed and implemented. | Individual (indirectly); Health professional; Health care organization                             |
| 58                 | <b>MyHealthAtVanderbilt - FluTool</b>                                                        | Vanderbilt University School of Medicine                          | USA            | A decision support application which is targeted to patients with influenza-like illness to enable triage of individuals at risk of influenza is integrated into a patient portal.                                                                                                                                                                                                           | Individual; Health care organization (indirectly)                                                  |
| 60                 | <b>Telemedicine for the Heart</b>                                                            | German Foundation for the Chronically Ill, Techniker Krankenkasse | Germany        | A telemedicine programme which consists of nurse-calls to motivate patients to perform regular self-measurements (blood pressure, pulse, weight) and their recording is offered to the members of a sickness fund in Germany (a sort of a social insurance). In the case the measured values are outside of set limits, calls to physicians are placed for therapy adjustments.              | Health professional; Health care organization; Payer organization (a social health insurance fund) |
| 61                 | <b>Lynch syndrome screening programme and clinical genetics services at Cleveland Clinic</b> | Cleveland Clinic                                                  | USA            | A screening programme for all colorectal patients is offered to identify mutations related with a familial form of it (Lynch syndrome).                                                                                                                                                                                                                                                      | Individual (indirectly); Health care organization                                                  |
| 62                 | <b>University of Florida (UF) Health Personalized Medicine Program (PMP)</b>                 | University of Florida                                             | USA            | Patients undergoing left heart catheterization and percutaneous-coronary intervention are genotyped preemptively to predict the response to a drug which is likely to be prescribed afterward the procedure (pharmacogenetics). Results are incorporated to electronic health records of the individual, assisted with a clinical decision support tool.                                     | Health professional; Health care organization                                                      |

| <b>P-<br/>No.†</b> | <b>Practices</b>                                                                         | <b>Setting:<br/>Institution<br/>implemented</b>                 | <b>Country</b> | <b>Short description</b>                                                                                                                                                                                                                                                                                         | <b>Axis-2: Group served<br/>to</b>                                                           |
|--------------------|------------------------------------------------------------------------------------------|-----------------------------------------------------------------|----------------|------------------------------------------------------------------------------------------------------------------------------------------------------------------------------------------------------------------------------------------------------------------------------------------------------------------|----------------------------------------------------------------------------------------------|
| 66                 | <b>Clinical Pharmacogenomics Implementation Program at the University of Chicago</b>     | University of Chicago                                           | USA            | Patients enrolled are provided broad pharmacogenomic testing preemptively, i.e. before the relevant drug is indicated. Results are available via genomic prescribing system portal, which also provides guidance on use of drugs based on the results.                                                           | Health professional; Health care organization                                                |
| 67                 | <b>Interdisciplinary model of care for cardiogenetics</b>                                | Montefiore Medical Center (Albert Einstein College of Medicine) | USA            | An interdisciplinary model of care is provided for families with a history of sudden cardiac death or event, addressing genetic, psychological, ethical and medical issues.                                                                                                                                      | Individual (indirectly); Health professional; Health care organization (indirectly)          |
| 68                 | <b>Coriell Personalized Medicine Collaborative - Pharmacogenomics</b>                    | See P-27 above                                                  | USA            | A systematic process is developed for critically evaluating and translating published drug-specific pharmacogenetic data for pharmacogenetic risk reporting. These reports are delivered through secure web portal, accessible by the individuals and their care givers.                                         | Individual; Health professional (optional/indirectly); Health care organization (indirectly) |
| 69                 | <b>The Oral-Systemic Personalized Medicine Model at Marshfield Clinic</b>                | Marshfield Clinic                                               | USA            | Medical and dental electronic health records are integrated and a clinical decision support system is introduced to support diabetic individuals get a dental visit and dental patients under risk of diabetes or with diabetes get a medical visit.                                                             | Health professional; Health care organization                                                |
| 71                 | <b>Individualized Medicine Clinic at Mayo Clinic</b>                                     | Mayo Clinic                                                     | USA            | Two lines of services are introduced in this clinic: 1) tumor genomics services for patients with advanced cancer who fail standard therapy; 2) Whole Exome Sequencing and interpretation services for patients with a suspected genetic condition for whom previous genetic testing did not reveal an etiology. | Health professional; Health care organization                                                |
| 74                 | <b>Pharmacogenetic Smoking Cessation Intervention</b>                                    | Group Health Cooperative                                        | USA            | A patient-centered service to quit smoking including genetic testing to tailor pharmacotherapy is developed and implemented.                                                                                                                                                                                     | Individual (indirectly); Health professional; Health care organization                       |
| 75                 | <b>The University of Texas MD Anderson Cancer Center experience with cancer genomics</b> | The University of Texas MD Anderson Cancer Center               | USA            | Tumor genomics services are established in a cancer center, including a sequential genomic analysis protocol involving targeted mutation testing, targeted full length sequencing and whole exome or genome sequencing.                                                                                          | Health professional; Health care organization (indirectly)                                   |

| <b>P-<br/>No.†</b> | <b>Practices</b>                                                   | <b>Setting:<br/>Institution<br/>implemented</b>   | <b>Country</b> | <b>Short description</b>                                                                                                                                                                                                                                                                                                                                  | <b>Axis-2: Group served<br/>to</b>                                     |
|--------------------|--------------------------------------------------------------------|---------------------------------------------------|----------------|-----------------------------------------------------------------------------------------------------------------------------------------------------------------------------------------------------------------------------------------------------------------------------------------------------------------------------------------------------------|------------------------------------------------------------------------|
| <b>77</b>          | <b>WHOLE - Wellness and Health Omics Linked to the Environment</b> | Georgia Institute of Technology, Emory University | USA            | Clinical data, lifestyle data and family health history is obtained every 6-12 months from individuals and annual health evaluations are made to help individuals make more informed health decisions. For a subset of participants, whole genome sequencing and other deep genomic profiling is carried out to be combined with the clinical assessment. | Individual; Health professional; Health care organization              |
| <b>80</b>          | <b>Health Coaching and Genomics</b>                                | Duke University, US Air Force                     | USA            | Individuals are offered a risk counseling for coronary heart disease and type 2 diabetes using conventional risk factors and genetic test results, and followed-up with health coaching.                                                                                                                                                                  | Individual; Health professional; Health care organization              |
| <b>82</b>          | <b>Preemptive Pharmacogenomics at Mayo Clinic</b>                  | Mayo Clinic                                       | USA            | Selected patients are tested for pharmacogenetic genes (sequencing and genotyping) preemptively, i.e. before the relevant drug is indicated. Clinically actionable results are integrated to the electronic medical record of the individuals. A clinical decision support system is developed and implemented at the point of care.                      | Individual (minor); Health professional; Health care organization      |
| <b>86</b>          | <b>Youth Area for adolescent and young adult cancer patients</b>   | CRO National Cancer Institute                     | Italy          | A special unit for adolescents and young adults (Youth Area) is created at a cancer research hospital to provide patient-centered assistance, in particular for their psychosocial needs.                                                                                                                                                                 | Individual (and his/her family); Health care organization (indirectly) |

† Numbering is based on Table S1. These numbers are used as identifier of each practice and referred with a “P-” number in the text.

\*\* Not active or in service anymore

1 Gentest was reported to be implemented in two facets: as a health practice to individuals via authorized practitioners, which continues today, and as an implementation model at GENAR's relevant center, which is not active anymore.

2 GeneInsight started as an implementation model in one institution but now it is available for others as well.

**Table S5: Emerging practices (Category-3)**

| <b>P-<br/>No.†</b> | <b>Practices</b>                                                                     | <b>Setting:<br/>developer</b>       | <b>Country</b> | <b>Short description</b>                                                                                                                                                                                                                                                                | <b>Axis-2: Group served<br/>to</b>                                                            |
|--------------------|--------------------------------------------------------------------------------------|-------------------------------------|----------------|-----------------------------------------------------------------------------------------------------------------------------------------------------------------------------------------------------------------------------------------------------------------------------------------|-----------------------------------------------------------------------------------------------|
| 3                  | <b>Group: Adoptive T cell therapy for cancer</b>                                     | N/A                                 | -              | Transfusion of T cells to cancer patients after adopting with various methods to treat cancer (patient's own cells or donor cells)                                                                                                                                                      | Health professional                                                                           |
| 9                  | <b>Group: Smartphone-Based Personal, Pervasive Health Informatics Services</b>       | Various                             | -              | Smartphone-based personal health informatics (incl. sensor, signal and imaging informatics) applications for provision and improvement of diagnosis, acute and chronic treatment and rehabilitation services as well as supporting self-care to stay healthy/prevention of diseases     | Individual; Health professional                                                               |
| 10                 | <b>Internet-based Personalised Healthcare Information (PHI) dissemination system</b> | Universiti Sains Malaysia           | Malaysia       | A system providing customized health maintenance information via internet proactively based on one's electronic medical record                                                                                                                                                          | Individual                                                                                    |
| 13                 | <b>IT-based Diagnostic Instrumentation Systems</b>                                   | Seul National University            | Korea          | A personal wearable device including wrist-worn health monitoring device, a blood glucometer integrated to a cell phone and a home telehealthcare system including bio-signal measurement systems that can measure, for example, ECG, body temperature, body-fat ratio on a toilet seat | Individual                                                                                    |
| 15                 | <b>Preventing Suicide Network (PSN) **</b>                                           | State University of New York        | USA            | An online resource center that provides information about suicide prevention to intermediaries (people who help individuals at risk of suicide)                                                                                                                                         | Individuals (indirectly via family, friends, teachers, colleagues, etc.); Health professional |
| 16                 | <b>Mobile Ototoxicity Monitoring Instrumentation</b>                                 | Veteran Affairs Medical Center      | USA            | A mobile audological instrument platform to be used in hospital wards in order to detect ototoxic change early and prevent hearing loss.                                                                                                                                                | Health professional; Health care organization (indirectly)                                    |
| 18                 | <b>Pediatric Psychosocial Preventative Health Model (PPPHM)</b>                      | Children's Hospital of Philadelphia | USA            | A biopsychosocial framework for assessing and treating families of children in pediatric health care settings                                                                                                                                                                           | Health professional; Health care organization                                                 |
| 19                 | <b>Patient-Nutritionist social network</b>                                           | Politecnico di Milano               | Italy          | An online social networking platform for patients and nutritionists to communicate and interact within and across the patient community and nutritionist community                                                                                                                      | Individual; Health professional                                                               |

| <b>P-<br/>No.†</b> | <b>Practices</b>                                                        | <b>Setting:<br/>developer</b>                                 | <b>Country</b> | <b>Short description</b>                                                                                                                                                                                                                                                                                                                                   | <b>Axis-2: Group served<br/>to</b>                                                               |
|--------------------|-------------------------------------------------------------------------|---------------------------------------------------------------|----------------|------------------------------------------------------------------------------------------------------------------------------------------------------------------------------------------------------------------------------------------------------------------------------------------------------------------------------------------------------------|--------------------------------------------------------------------------------------------------|
| 28                 | <b>GliomaPredict</b>                                                    | National Cancer Institute                                     | USA            | An algorithm for prediction of the outcome of gliomas (a brain tumor) based on their transcriptomic profile                                                                                                                                                                                                                                                | Health professional; Health care organization (indirectly)                                       |
| 34                 | <b>Personalised medicine in wound care</b>                              | PathoGenius Diagnostics, Southwest Regional Wound Care Center | USA            | Tailoring the systemic and topical antimicrobial treatment based on the diagnostic tests that identify the pathogens on the wound                                                                                                                                                                                                                          | Health professional                                                                              |
| 36                 | <b>Recon 1 (A global metabolic network reconstruction)</b>              | University of California                                      | USA            | Network analysis of metabolomic profiles of an individual to identify the required therapy                                                                                                                                                                                                                                                                 | Health professional                                                                              |
| 37                 | <b>Personalized Systems Medicine Approach</b>                           | Ohio State University Medical Center                          | USA            | "Personalized systems medicine approach", reported to be implemented on one patient: the patient is approached as a whole person within the illness trajectory, rather than specific illnesses at specific time points.                                                                                                                                    | Individual (indirectly); Health professional (for and by); Health care organization (indirectly) |
| 40                 | <b>Data-modelling and visualization in chronic kidney disease</b>       | University of Surrey                                          | UK             | Creation of a data display for visualizing individual patient's renal function in smoothed trend lines                                                                                                                                                                                                                                                     | Health professional                                                                              |
| 45                 | <b>Next Generation Service Delivery Platform</b>                        | University of Patras, Rion University Hospital                | Greece         | A system which 1) collects patient data and creates treatment scenarios, 2) monitors patient and detects the scenarios to take necessary action, such as establishing contact with the physician                                                                                                                                                           | Individual; Health professional                                                                  |
| 46                 | <b>Personal Genome Project</b>                                          | Harvard Medical School                                        | USA            | Based on the genetic test results interpreted via Genome-Environment-Trait Evidence (GET-Evidence) system, which is a tool that automatically processes genomes and prioritizes both published and novel variants for interpretation, the Personal Genome Project participants received information on possible diseases, which led to medical follow-ups. | Individual                                                                                       |
| 47                 | <b>Computer-Assisted Brief Intervention for Tobacco (CABIT) Program</b> | Cooper University Hospital & Polaris Health Directions, Inc.  | USA            | A computer based tool to assist quitting smoking in clinical settings, which carries out a self-administered computerized assessment to produce reports for health care provider and patient, cue a stage-matched video intervention and provide referral for smoking cessation                                                                            | Individual; Health professional; Health care organization (indirectly)                           |

| <b>P-<br/>No.†</b> | <b>Practices</b>                                                 | <b>Setting:<br/>developer</b>        | <b>Country</b> | <b>Short description</b>                                                                                                                                                                                                                                                                                                                                                                                                     | <b>Axis-2: Group served<br/>to</b>            |
|--------------------|------------------------------------------------------------------|--------------------------------------|----------------|------------------------------------------------------------------------------------------------------------------------------------------------------------------------------------------------------------------------------------------------------------------------------------------------------------------------------------------------------------------------------------------------------------------------------|-----------------------------------------------|
| 50                 | <b>integrative Personal Omics Profile (iPOP)</b>                 | Stanford University                  | USA            | Extensive omics profiling of blood components from a generally healthy individual was performed over a 14 month period. The whole genome sequencing data was analyzed with RiskOGRAM algorithm, which integrates information from multiple alleles associated with disease risk. It indicated an increased risk of type 2 diabetes, which actually developed during the follow-up period and was diagnosed by the physician. | Individual                                    |
| 51                 | <b>Coronary Heart Disease Risk Assessment (CHDRA)</b>            | Marshfield Clinic                    | USA            | A coronary heart disease risk assessment model using serum protein levels and conventional clinical risk factors                                                                                                                                                                                                                                                                                                             | Individual (indirectly); Health professional  |
| 52                 | <b>Electronic health record - OntoKBFC</b>                       | NIH Clinical Center                  | USA            | Integration of molecular genetics laboratory results into electronic health records and linking them to an existing knowledge base for the relevant disease (in this case, cystic fibrosis)                                                                                                                                                                                                                                  | Health professional; Health care organization |
| 54                 | <b>Health Improvement and Management System (HIMS)</b>           | Yongin Songdam College               | Korea          | An integrated system to measure body features regularly (weight, body fat, blood pressure) to control them                                                                                                                                                                                                                                                                                                                   | Individual                                    |
| 59                 | <b>Quantified-self</b>                                           | University of California             | USA            | An individual followed various parameters related to his body longitudinally (digital biomedical measurement devices and blood and stool biomarkers) and identified abnormal patterns, which led to clinical diagnosis of a disease.                                                                                                                                                                                         | Individual                                    |
| 64                 | <b>Collaborative Assessment and Recommendation Engine (CARE)</b> | University of Notre Dame             | USA            | An informatics tool that provides disease risk predictions for individuals based on the health care records of large populations                                                                                                                                                                                                                                                                                             | Individual; Health professional               |
| 65                 | <b>Gaussian process framework</b>                                | University of Oxford                 | UK             | A Gaussian process framework that aims to facilitate patient monitoring in wards by providing analysis and inference in the presence of data uncertainty                                                                                                                                                                                                                                                                     | Health professional                           |
| 72                 | <b>Pregnancy and Health Profile (PHP)</b>                        | March of Dimes Foundation and others | USA            | An electronic patient-entered family health history tool that provides clinical decision support and point-of-care education to assist with patient management                                                                                                                                                                                                                                                               | Health professional; Health care organization |

| <b>P-No.†</b> | <b>Practices</b>                                                                                           | <b>Setting: developer</b>              | <b>Country</b>    | <b>Short description</b>                                                                                                                                                                                                                                                                                                                                                                                                                              | <b>Axis-2: Group served to</b>                                    |
|---------------|------------------------------------------------------------------------------------------------------------|----------------------------------------|-------------------|-------------------------------------------------------------------------------------------------------------------------------------------------------------------------------------------------------------------------------------------------------------------------------------------------------------------------------------------------------------------------------------------------------------------------------------------------------|-------------------------------------------------------------------|
| 76            | <b>Integration of deep brain stimulation and whole genome sequencing for obsessive compulsive disorder</b> | Medtronic                              | USA               | Integration of deep brain stimulation and whole genome sequencing in the evaluation, treatment and preventive care for the case of an obsessive compulsive disorder patient. In addition to implantation of a deep brain stimulation therapy device; whole genome sequencing was carried out, which identified a variant related to an inherited condition that might explain the symptoms of the case; common variants and pharmacogenomic variants. | Individual (indirectly); Health professional                      |
| 78            | <b>IAServ: An Intelligent Home Care Web Services Platform in a Cloud for Aging-in-Place</b>                | Yuan Ze University                     | Taiwan            | A home care web services platform to assist aging-in-place by generating care plans (subject to approval of the health care provider), making arrangements such as appointments and pick-up services and reminders                                                                                                                                                                                                                                    | Individual (minor); Health professional; Health care organization |
| 81            | <b>Kaleidoscope model of diabetes care</b>                                                                 | University of Southampton and others   | UK, Germany       | A model of care that proposes the encompassing of environment, intrinsic thought and therapy regimens to provide tailored, personalized healthcare in order to support enhanced diabetes self-management and outcomes                                                                                                                                                                                                                                 | Individual; Health professional                                   |
| 84            | <b>ALGA-C (questionnaire that measures and collects psycho-cognitive information about patients)</b>       | P-medicine project                     | Greece, Italy, UK | An electronic questionnaire which aim to provide a psycho-cognitive picture of the patient with whom the physician is about to meet, so that the physician can use the feedback from the questionnaire to optimize the communication style and interaction with the patient                                                                                                                                                                           | Health professional                                               |
| 85            | <b>A prototype for automated interpretation of genetic tests</b>                                           | Oslo University Hospital               | Norway            | A prototype of an algorithm and reporting system for a pharmacogenetic test (CYP3A5 - tacrolimus dose)                                                                                                                                                                                                                                                                                                                                                | Health professional                                               |
| 87            | <b>A case of whole-exome sequencing from a prostate cancer bone metastasis biopsy</b>                      | University of California San Francisco | USA               | Whole exome sequencing was carried out on prostate cancer bone metastasis biopsy. The results identified genomic alterations which may impact decisions on therapy.                                                                                                                                                                                                                                                                                   | Health professional                                               |
| 88            | <b>A Hybrid Mobile-Cloud Approach for ECG Telemonitoring</b>                                               | University of Maryland                 | USA               | A mobile-cloud based electrocardiograph monitoring using a smartphone                                                                                                                                                                                                                                                                                                                                                                                 | Health professional                                               |

† Numbering is based on Table S1. These numbers are used as identifier of each practice and referred with a “P-“ number in the text.

\*\* Not active or in service anymore



## References

- Abidi SS, Goh A. A personalised Healthcare Information Delivery System: pushing customised healthcare information over the WWW. *Studies in health technology and informatics*. 2000;77:663-7. Epub 2001/02/24. PubMed PMID: 11187636.
- Abidi SS, Han CY, Abidi SR. Patient empowerment via 'pushed' delivery of Personalised Healthcare educational content over the internet. *Studies in health technology and informatics*. 2001;84(Pt 2):1425-9. Epub 2001/10/18. PubMed PMID: 11604961.
- Agboola SO, Ball M, Kvedar JC, Jethwani K. The future of Connected Health in preventive medicine. *QJM : monthly journal of the Association of Physicians*. 2013;106(9):791-4. Epub 2013/04/20. doi: 10.1093/qjmed/hct088. PubMed PMID: 23598385.
- Andre F, Ciccolini J, Spano JP, Penault-Llorca F, Mounier N, Freyer G, et al. Personalized medicine in oncology: where have we come from and where are we going? *Pharmacogenomics*. 2013;14(8):931-9. Epub 2013/06/12. doi: 10.2217/pgs.13.79. PubMed PMID: 23746187.
- Andre F, Nowak F, Arnedos M, Lacroix L, Viens P, Calvo F. Biomarker discovery, development, and implementation in France: a report from the French National Cancer Institute and cooperative groups. *Clinical cancer research : an official journal of the American Association for Cancer Research*. 2012;18(6):1555-60. Epub 2012/03/17. doi: 10.1158/1078-0432.ccr-11-2201. PubMed PMID: 22422408.
- Andriopoulou FG, Lazarou NG, Lymberopoulos DK. A proposed Next Generation Service Delivery Platform (NG-SDP) for eHealth domain. *Conference proceedings : Annual International Conference of the IEEE Engineering in Medicine and Biology Society IEEE Engineering in Medicine and Biology Society Conference*. 2012;2012:6064-7. Epub 2013/02/01. doi: 10.1109/embc.2012.6347377. PubMed PMID: 23367312.
- Arango BA, Rivera CL, Gluck S. Gene expression profiling in breast cancer. *American journal of translational research*. 2013;5(2):132-8. Epub 2013/04/11. PubMed PMID: 23573359; PubMed Central PMCID: PMC3612510.
- Arar N, Seo J, Abboud HE, Parchman M, Noel P. Veterans' experience in using the online Surgeon General's family health history tool. *Personalized medicine*. 2011;8(5):523-32. Epub 2011/11/15. doi: 10.2217/pme.11.53. PubMed PMID: 22076122; PubMed Central PMCID: PMC3210025.
- Ardini E, Galvani A. ALK Inhibitors, a Pharmaceutical Perspective. *Frontiers in oncology*. 2012;2:17. Epub 2012/06/02. doi: 10.3389/fonc.2012.00017. PubMed PMID: 22655263; PubMed Central PMCID: PMC3356102.
- Arnedos M, Vielh P, Soria JC, Andre F. The genetic complexity of common cancers and the promise of personalized medicine: is there any hope? *The Journal of pathology*. 2014;232(2):274-82. Epub 2013/10/12. doi: 10.1002/path.4276. PubMed PMID: 24114621.
- Aronson SJ, Clark EH, Babb LJ, Baxter S, Farwell LM, Funke BH, et al. The GeneInsight Suite: a platform to support laboratory and provider use of DNA-based genetic testing. *Human mutation*. 2011;32(5):532-6. Epub 2011/03/25. doi: 10.1002/humu.21470. PubMed PMID: 21432942; PubMed Central PMCID: PMC3082613.
- Arribas-Ayllon M, Sarangi S, Clarke A. Promissory accounts of personalisation in the commercialisation of genomic knowledge. *Communication & medicine*. 2011;8(1):53-66. Epub 2011/01/01. PubMed PMID: 22616356.

Babic N. Clinical pharmacogenomics and concept of personalized medicine. *Journal of Medical Biochemistry*. 2012;31(4):281-6. doi: <http://dx.doi.org/10.2478/v10011-012-0021-2>. PubMed PMID: 2013257663.

Bailey AM, Mao Y, Zeng J, Holla V, Johnson A, Brusco L, et al. Implementation of biomarker-driven cancer therapy: existing tools and remaining gaps. *Discovery medicine*. 2014;17(92):101-14. Epub 2014/02/19. PubMed PMID: 24534473.

Ball MP, Thakuria JV, Zaranek AW, Clegg T, Rosenbaum AM, Wu X, et al. A public resource facilitating clinical use of genomes. *Proceedings of the National Academy of Sciences of the United States of America*. 2012;109(30):11920-7. Epub 2012/07/17. doi: 10.1073/pnas.1201904109. PubMed PMID: 22797899; PubMed Central PMCID: PMC3409785.

Barnard KD, Lloyd CE, Dyson PA, Davies MJ, O'Neil S, Komunilli N, et al. Kaleidoscope model of diabetes care: time for a rethink? *Diabetic medicine : a journal of the British Diabetic Association*. 2014. Epub 2014/02/11. doi: 10.1111/dme.12400. PubMed PMID: 24506524.

Bartlett G, Avar D, Knoppers BM. A new twist on an old problem: Primary care physicians and results from direct-to-consumer genetic testing. *Personalized Medicine*. 2013;10(8):827-33. doi: <http://dx.doi.org/10.2217/pme.13.87>. PubMed PMID: 2013680515.

Bielinski SJ, Olson JE, Pathak J, Weinshilboum RM, Wang L, Lyke KJ, et al. Preemptive genotyping for personalized medicine: design of the right drug, right dose, right time-using genomic data to individualize treatment protocol. *Mayo Clinic proceedings*. 2014;89(1):25-33. Epub 2014/01/07. doi: 10.1016/j.mayocp.2013.10.021. PubMed PMID: 24388019; PubMed Central PMCID: PMC3932754.

Bonacina S, Privitera YA, Marsilio S, Montin E, Passarelli F, Masseroli M, et al. A web-based tool for cooperating behaviors in eating and physical activity control. *Studies in health technology and informatics*. 2009;144:155-9. Epub 2009/07/14. PubMed PMID: 19592754.

Boudreaux ED, Bedek KL, Byrne NJ, Baumann BM, Lord SA, Grissom G. The Computer-Assisted Brief Intervention for Tobacco (CABIT) program: a pilot study. *Journal of medical Internet research*. 2012;14(6):e163. Epub 2012/12/05. doi: 10.2196/jmir.2074. PubMed PMID: 23208070; PubMed Central PMCID: PMC3799483.

Brown RE, Dorion RP, Trowbridge C, Stammers AH, Fitt W, Davis J. Algorithmic and consultative integration of transfusion medicine and coagulation: a personalized medicine approach with reduced blood component utilization. *Annals of clinical and laboratory science*. 2011;41(3):211-6. Epub 2011/11/15. PubMed PMID: 22075502.

Brufsky A, Lokay K, McDonald M. Driving Evidence-Based Standardization of Care within a Framework of Personalized Medicine. *American Society of Clinical Oncology educational book / ASCO American Society of Clinical Oncology Meeting*. 2012;32:e62-e5. Epub 2012/01/01. doi: 10.14694/EdBook\_AM.2012.32.e62. PubMed PMID: 24451833.

Burnette R, Simmons LA, Snyderman R. Personalized health care as a pathway for the adoption of genomic medicine. *Journal of Personalized Medicine*. 2012;2(4):232-40. doi: <http://dx.doi.org/10.3390/jpm2040232>. PubMed PMID: 2013123735.

Cardoso F, Piccart-Gebhart M, Van't Veer L, Rutgers E. The MINDACT trial: the first prospective clinical validation of a genomic tool. *Molecular oncology*. 2007;1(3):246-51. Epub 2007/12/01. doi: 10.1016/j.molonc.2007.10.004. PubMed PMID: 19383299.

Cesuroglu T, Karaca S, Erge S. A practice model for personalized healthcare with a public health genomics perspective. *Personalized Medicine*. 2009;6(5):567-77. doi: <http://dx.doi.org/10.2217/pme.09.37>. PubMed PMID: 2009654729.

Chang HL, Shaw MJ, Lai F, Ko WJ, Ho YL, Chen HS, et al. U-Health: An example of a high-quality individualized healthcare service. *Personalized Medicine*. 2010;7(6):677-87. doi: <http://dx.doi.org/10.2217/pme.10.64>. PubMed PMID: 2010678525.

Chawla NV, Davis DA. Bringing big data to personalized healthcare: a patient-centered framework. *Journal of general internal medicine*. 2013;28 Suppl 3:S660-5. Epub 2013/06/26. doi: 10.1007/s11606-013-2455-8. PubMed PMID: 23797912; PubMed Central PMCID: PMC3744281.

Chen R, Mias GI, Li-Pook-Than J, Jiang L, Lam HY, Chen R, et al. Personal omics profiling reveals dynamic molecular and medical phenotypes. *Cell*. 2012;148(6):1293-307. Epub 2012/03/20. doi: 10.1016/j.cell.2012.02.009. PubMed PMID: 22424236; PubMed Central PMCID: PMC3341616.

Cheng S, Koch WH, Wu L. Co-development of a companion diagnostic for targeted cancer therapy. *New biotechnology*. 2012;29(6):682-8. Epub 2012/03/07. doi: 10.1016/j.nbt.2012.02.002. PubMed PMID: 22391147.

Chua EW, Kennedy MA. Current State and Future Prospects of Direct-to-Consumer Pharmacogenetics. *Frontiers in pharmacology*. 2012;3:152. Epub 2012/08/31. doi: 10.3389/fphar.2012.00152. PubMed PMID: 22934000; PubMed Central PMCID: PMC3422723.

Chun H, Kang J, Kim KJ, Park KS, Kim HC. IT-based diagnostic instrumentation systems for personalized healthcare services. *Studies in health technology and informatics*. 2005;117:180-90. Epub 2005/11/12. PubMed PMID: 16282668.

Clifton L, Clifton DA, Pimentel MA, Watkinson PJ, Tarassenko L. Gaussian processes for personalized e-health monitoring with wearable sensors. *IEEE transactions on bio-medical engineering*. 2013;60(1):193-7. Epub 2012/12/27. doi: 10.1109/tbme.2012.2208459. PubMed PMID: 23268532.

Cohen J, Wilson A, Manziolillo K. Clinical and economic challenges facing pharmacogenomics. *The pharmacogenomics journal*. 2013;13(4):378-88. Epub 2012/01/11. doi: 10.1038/tpj.2011.63. PubMed PMID: 22231566.

Cross DS, McCarty CA, Hytopoulos E, Beggs M, Nolan N, Harrington DS, et al. Coronary risk assessment among intermediate risk patients using a clinical and biomarker based algorithm developed and validated in two population cohorts. *Current medical research and opinion*. 2012;28(11):1819-30. Epub 2012/10/25. doi: 10.1185/03007995.2012.742878. PubMed PMID: 23092312; PubMed Central PMCID: PMC3666558.

Dawe DE, Ellis PM. Challenges in implementing personalized medicine for lung cancer within a national healthcare system. *Journal of Personalized Medicine*. 2012;2(3):77-92. doi: <http://dx.doi.org/10.3390/jpm2030077>. PubMed PMID: 2013123741.

de Leon J. AmpliChip CYP450 test: personalized medicine has arrived in psychiatry. *Expert review of molecular diagnostics*. 2006;6(3):277-86. Epub 2006/05/19. doi: 10.1586/14737159.6.3.277. PubMed PMID: 16706732.

Dolan ME, Maitland ML, O'Donnell PH, Nakamura Y, Cox NJ, Ratain MJ. Institutional Profile: University of Chicago Center for Personalized Therapeutics: research, education and implementation science. *Pharmacogenomics*. 2013;14(12):1383-7. Epub 2013/09/13. doi: 10.2217/pgs.13.134. PubMed PMID: 24024891.

Donnan JR, Ungar WJ, Mathews M, Hancock-Howard RL, Rahman P. A cost effectiveness analysis of thiopurine methyltransferase testing for guiding 6-mercaptopurine dosing in children with acute lymphoblastic leukemia. *Pediatric blood & cancer*. 2011;57(2):231-9. Epub 2011/02/24. doi: 10.1002/pbc.22936. PubMed PMID: 21344614.

Donnelly E. XalKori: A new paradigm of therapeutic and companion diagnostic co-development. *Regulatory Rapporteur*. 2013;10(2):9-11. PubMed PMID: 2013056916.

Dotan ZA, Ramon J. Nomograms as a Tool in Predicting Prostate Cancer Prognosis. *European Urology, Supplements*. 2009;8(9):721-4. doi: <http://dx.doi.org/10.1016/j.eursup.2009.06.013>. PubMed PMID: 2009447552.

Dowd SE, Wolcott RD, Kennedy J, Jones C, Cox SB. Molecular diagnostics and personalised medicine in wound care: assessment of outcomes. *Journal of wound care*. 2011;20(5):232, 4-9. Epub 2011/06/08. PubMed PMID: 21647068.

Ellingson RM, Helt WJ, Kelt PV, Fausti SA. Instrumentation system upgrade supports mobile personalized healthcare delivery. Conference proceedings : Annual International Conference of the IEEE Engineering in Medicine and Biology Society IEEE Engineering in Medicine and Biology Society Conference. 2006;1:6233-6. Epub 2007/10/20. doi: 10.1109/iembs.2006.259474. PubMed PMID: 17945947.

Ely S. Personalized medicine: individualized care of cancer patients. *Translational research : the journal of laboratory and clinical medicine*. 2009;154(6):303-8. Epub 2009/11/26. doi: 10.1016/j.trsl.2009.08.001. PubMed PMID: 19931196.

Erskine KE, Griffith E, Degroat N, Stolerman M, Silverstein LB, Hidayatallah N, et al. An interdisciplinary approach to personalized medicine: case studies from a cardiogenetics clinic. *Personalized medicine*. 2013;10(1):73-80. Epub 2014/02/06. doi: 10.2217/pme.12.108. PubMed PMID: 24496296; PubMed Central PMCID: PMC3564672.

Farrugia G, Weinshilboum RM. Challenges in implementing genomic medicine: the Mayo Clinic Center for Individualized Medicine. *Clinical pharmacology and therapeutics*. 2013;94(2):204-6. Epub 2013/04/17. doi: 10.1038/clpt.2013.52. PubMed PMID: 23588321; PubMed Central PMCID: PMC3909951.

Faruki H, Lai-Goldman M. Application of a pharmacogenetic test adoption model to six oncology biomarkers. *Personalized Medicine*. 2010;7(4):441-50. doi: <http://dx.doi.org/10.2217/pme.10.37>. PubMed PMID: 2010519103.

Ferrusi IL, Earle CC, Trudeau M, Leigh NB, Pullenayegum E, Khong H, et al. Closing the personalized medicine information gap: HER2 test documentation practice. *The American journal of managed care*. 2013;19(1):838-44. Epub 2013/02/06. PubMed PMID: 23379747; PubMed Central PMCID: PMC3919466.

Gambacorti-Passerini C. Part I: Milestones in personalised medicine--imatinib. *The lancet oncology*. 2008;9(6):600. Epub 2008/05/31. doi: 10.1016/s1470-2045(08)70152-9. PubMed PMID: 18510992.

Gardiner SJ, Begg EJ. Pharmacogenetic testing for drug metabolizing enzymes: Is it happening in practice? *Pharmacogenetics and Genomics*. 2005;15(5):365-9. PubMed PMID: 2005220139.

Gelmon K. Part II: Milestones in personalised medicine--trastuzumab. *The lancet oncology*. 2008;9(7):698. Epub 2008/07/05. doi: 10.1016/s1470-2045(08)70177-3. PubMed PMID: 18598935.

Gharani N, Keller MA, Stack CB, Hodges LM, Schmidlen TJ, Lynch DE, et al. The Coriell personalized medicine collaborative pharmacogenomics appraisal, evidence scoring and interpretation system. *Genome medicine*. 2013;5(10):93. Epub 2013/10/19. doi: 10.1186/gm499. PubMed PMID: 24134832.

Gibson G. Wellness and health omics linked to the environment: the WHOLE approach to personalized medicine. *Advances in experimental medicine and biology*. 2014;799:1-14. Epub 2013/12/03. doi: 10.1007/978-1-4614-8778-4\_1. PubMed PMID: 24292959.

Glurich I, Acharya A, Shukla SK, Nycz GR, Brilliant MH. The oral-systemic personalized medicine model at Marshfield Clinic. *Oral diseases*. 2013;19(1):1-17. Epub 2012/03/31. doi: 10.1111/j.1601-0825.2012.01921.x. PubMed PMID: 22458294; PubMed Central PMCID: PMC3389173.

Gollust SE, Gordon ES, Zayac C, Griffin G, Christman MF, Pyeritz RE, et al. Motivations and perceptions of early adopters of personalized genomics: perspectives from research participants. *Public health genomics*. 2012;15(1):22-30. Epub 2011/06/10. doi: 10.1159/000327296. PubMed PMID: 21654153; PubMed Central PMCID: PMC3225236.

Gordon ES, Griffin G, Wawak L, Pang H, Gollust SE, Bernhardt BA. "It's not like judgment day": public understanding of and reactions to personalized genomic risk information. *Journal of genetic counseling*. 2012;21(3):423-32. Epub 2011/12/20. doi: 10.1007/s10897-011-9476-4. PubMed PMID: 22180182; PubMed Central PMCID: PMC3348376.

Gottesman O, Scott SA, Ellis SB, Overby CL, Ludtke A, Hulot JS, et al. The CLIPMERGE PGx Program: clinical implementation of personalized medicine through electronic health records and genomics-pharmacogenomics. *Clinical pharmacology and therapeutics*. 2013;94(2):214-7. Epub 2013/04/17. doi: 10.1038/clpt.2013.72. PubMed PMID: 23588317; PubMed Central PMCID: PMC3720762.

Gundert-Remy U, Dimovski A, Gajovic S. Personalized medicine - where do we stand? Pouring some water into wine: a realistic perspective. *Croatian medical journal*. 2012;53(4):314-20. Epub 2012/08/23. PubMed PMID: 22911523; PubMed Central PMCID: PMC3428819.

Gundlapalli AV, Delgado JC, Jackson BR, Tricot GJ, Hill HR. Composite patient reports: a laboratory informatics perspective and pilot project for personalized medicine and translational research. *Summit on translational bioinformatics*. 2009;2009:39-43. Epub 2009/01/01. PubMed PMID: 21347168; PubMed Central PMCID: PMC3041581.

Guo Y, Shi L, Hong H, Su Z, Fuscoe J, Ning B. Studies on abacavir-induced hypersensitivity reaction: a successful example of translation of pharmacogenetics to personalized medicine. *Science China Life sciences*. 2013;56(2):119-24. Epub 2013/02/09. doi: 10.1007/s11427-013-4438-8. PubMed PMID: 23393027.

Hartzler A, McCarty CA, Rasmussen LV, Williams MS, Brilliant M, Bowton EA, et al. Stakeholder engagement: a key component of integrating genomic information into electronic health records. *Genetics in medicine : official journal of the American College of Medical Genetics*. 2013;15(10):792-801. Epub 2013/09/14. doi: 10.1038/gim.2013.127. PubMed PMID: 24030437; PubMed Central PMCID: PMC3909653.

Hawkins-Taylor C, Carlson AM. Communication strategies must be tailored to a medication's targeted population: Lessons from the case of BiDil. *American Health and Drug Benefits*. 2013;6(7):401-12. PubMed PMID: 2013685943.

Heidbuchel H. Telemonitoring of implantable cardiac devices: hurdles towards personalised medicine. *Heart (British Cardiac Society)*. 2011;97(11):931-9. Epub 2011/05/12. doi: 10.1136/hrt.2009.188789. PubMed PMID: 21558069.

Herman L, Froelich J, Kanelos D, St Amant R, Yau M, Rhees B, et al. Utility of a Genomic-based, Personalized Medicine Test in Patients Presenting With Symptoms Suggesting Coronary Artery Disease. *Journal of the American Board of Family Medicine : JABFM*. 2014;27(2):258-67. Epub 2014/03/13. doi: 10.3122/jabfm.2014.02.130155. PubMed PMID: 24610188.

Housman L. Innovative tests for patient-tailored treatments: Demonstrating value in the age of personalized medicine. *Personalized Medicine*. 2011;8(2):183-9. doi: <http://dx.doi.org/10.2217/pme.10.90>. PubMed PMID: 2011145488.

Hresko A, Haga SB. Insurance coverage policies for personalized medicine. *Journal of Personalized Medicine*. 2012;2(4):201-16. doi: <http://dx.doi.org/10.3390/jpm2040201>. PubMed PMID: 2013123733.

Huang RS, Gamazon ER. Translating pharmacogenomics discoveries into the clinic: an implementation framework. *Genome medicine*. 2013;5(10):94. Epub 2013/10/19. doi: 10.1186/gm497. PubMed PMID: 24134796.

Hulse NC, Ranade-Kharkar P, Post H, Wood GM, Williams MS, Haug PJ. Development and early usage patterns of a consumer-facing family health history tool. *AMIA Annual Symposium proceedings / AMIA Symposium AMIA Symposium*. 2011;2011:578-87. Epub 2011/12/24. PubMed PMID: 22195113; PubMed Central PMCID: PMC3243155.

Issa AM, Weiss LT, Tufail W, Phillips KA, Van Bebber SL. Innovation in personalized medicine: BiDil as a case study for integrating clinical and policy developments. *Personalized Medicine*. 2006;3(4):421-7. doi: <http://dx.doi.org/10.2217/17410541.3.4.421>. PubMed PMID: 2007003409.

Jain KK. Applications of AmpliChip CYP450. *Molecular diagnosis : a journal devoted to the understanding of human disease through the clinical application of molecular biology*. 2005;9(3):119-27. Epub 2005/11/08. PubMed PMID: 16271013.

Jamshidi N, Miller FJ, Mandel J, Evans T, Kuo MD. Individualized therapy of HHT driven by network analysis of metabolomic profiles. *BMC systems biology*. 2011;5:200. Epub 2011/12/22. doi: 10.1186/1752-0509-5-200. PubMed PMID: 22185482; PubMed Central PMCID: PMC3339509.

Janssens AC, Wilde AA, van Langen IM. The sense and nonsense of direct-to-consumer genetic testing for cardiovascular disease. *Netherlands heart journal : monthly journal of the Netherlands Society of Cardiology and the Netherlands Heart Foundation*. 2011;19(2):85-8. Epub 2011/04/05. doi: 10.1007/s12471-010-0069-x. PubMed PMID: 21461037; PubMed Central PMCID: PMC3040348.

Jethwani K, Kvedar J. Behavioral phenotyping: A tool for personalized medicine. *Personalized Medicine*. 2010;7(6):689-93. doi: <http://dx.doi.org/10.2217/pme.10.62>. PubMed PMID: 2010678523.

Jiang Y, Wang M. Personalized medicine in oncology: tailoring the right drug to the right patient. *Biomarkers in medicine*. 2010;4(4):523-33. Epub 2010/08/13. doi: 10.2217/bmm.10.66. PubMed PMID: 20701441.

Jing X, Kay S, Marley T, Hardiker NR, Cimino JJ. Incorporating personalized gene sequence variants, molecular genetics knowledge, and health knowledge into an EHR prototype based on the Continuity of Care Record standard. *Journal of biomedical informatics*. 2012;45(1):82-92. Epub 2011/09/29. doi: 10.1016/j.jbi.2011.09.001. PubMed PMID: 21946299; PubMed Central PMCID: PMC3272091.

Johnson JA, Burkley BM, Langaee TY, Clare-Salzler MJ, Klein TE, Altman RB. Implementing personalized medicine: development of a cost-effective customized pharmacogenetics genotyping array. *Clinical pharmacology and therapeutics*. 2012;92(4):437-9. Epub 2012/08/23. doi: 10.1038/clpt.2012.125. PubMed PMID: 22910441; PubMed Central PMCID: PMC3454443.

June CH. Adoptive T cell therapy for cancer in the clinic. *The Journal of clinical investigation*. 2007;117(6):1466-76. Epub 2007/06/06. doi: 10.1172/jci32446. PubMed PMID: 17549249; PubMed Central PMCID: PMC1878537.

Kanodia AK, Kim I, Sturmberg JP. A personalized systems medicine approach to refractory rumination. *Journal of evaluation in clinical practice*. 2011;17(3):515-9. Epub 2011/05/17. doi: 10.1111/j.1365-2753.2011.01669.x. PubMed PMID: 21569182.

Karczewski KJ, Tirrell RP, Cordero P, Tatonetti NP, Dudley JT, Salari K, et al. Interpretome: a freely available, modular, and secure personal genome interpretation engine. *Pacific Symposium on Biocomputing Pacific Symposium on Biocomputing*. 2012:339-50. Epub 2011/12/17. PubMed PMID: 22174289.

Kazak AE. Pediatric Psychosocial Preventative Health Model (PPPHM): Research, practice, and collaboration in pediatric family systems medicine. *Families, Systems and Health*. 2006;24(4):381-95. doi: <http://dx.doi.org/10.1037/1091-7527.24.4.381>.

Keller MA, Gordon ES, Stack CB, Gharani N, Sill CJ, Schmidlen TJ, et al. Coriell personalized medicine collaborative: A prospective study of the utility of personalized medicine. *Personalized Medicine*. 2010;7(3):301-17. doi: <http://dx.doi.org/10.2217/pme.10.13>.

Kelley RK, Van Bebber SL, Phillips KA, Venook AP. Personalized medicine and oncology practice guidelines: a case study of contemporary biomarkers in colorectal cancer. *Journal of the National Comprehensive Cancer Network : JNCCN*. 2011;9(1):13-25. Epub 2011/01/15. PubMed PMID: 21233242; PubMed Central PMCID: PMC3695822.

Khan NA, Peterson JF. A surveillance tool to support quality assurance and research in personalized medicine. *AMIA Annual Symposium proceedings / AMIA Symposium AMIA Symposium*. 2011;2011:701-8. Epub 2011/12/24. PubMed PMID: 22195126; PubMed Central PMCID: PMC3243202.

Kondylakis H, Kazantzaki E, Koumakis L, Genitsaridi I, Marias K, Gorini A, et al. Development of interactive empowerment services in support of personalised medicine. *Ecancelmedicalscience*. 2014;8:400. Epub 2014/02/26. doi: 10.3332/ecancer.2014.400. PubMed PMID: 24567757; PubMed Central PMCID: PMC3922652.

Kotze MJ, Van Velden DP, Botha K, Badenhorst CH, Avenant H, Van Rensburg SJ, et al. Pathology-supported genetic testing directed at shared disease pathways for optimized health in later life. *Personalized Medicine*. 2013;10(5):497-507. doi: <http://dx.doi.org/10.2217/pme.13.43>. PubMed PMID: 2013444038.

Laerum H, Bremer S, Bergan S, Grunfeld T. A taste of individualized medicine: physicians' reactions to automated genetic interpretations. *Journal of the American Medical Informatics Association : JAMIA*. 2014;21(e1):e143-6. Epub 2013/09/05. doi: 10.1136/amiajnl-2012-001587. PubMed PMID: 24001515; PubMed Central PMCID: PMC3957380.

Lazaridis KN, McAllister TM, Babovic-Vuksanovic D, Beck SA, Borad MJ, Bryce AH, et al. Implementing individualized medicine into the medical practice. *American journal of medical genetics Part C, Seminars in medical genetics*. 2014;166(1):15-23. Epub 2014/03/13. doi: 10.1002/ajmg.c.31387. PubMed PMID: 24616301.

Lee HJ, Kang KJ, Park SH, Ju SJ, Jin MH, Park BN. Effect of Integrated Personalized Health Care System on Middle-Aged and Elderly Women's Health. *Healthcare informatics research*. 2012;18(3):199-207. Epub 2012/11/02. doi: 10.4258/hir.2012.18.3.199. PubMed PMID: 23115743; PubMed Central PMCID: PMC3483478.

Lee JJ, Chu E. Oncotype DX for colon cancer: Are we ready for prime time in personalized medicine? *Current Colorectal Cancer Reports*. 2013;9(4):312-6. doi: <http://dx.doi.org/10.1007/s11888-013-0186-1>. PubMed PMID: 2014034268.

Leopold C, Vogler S, Habl C, Mantel-Teeuwisse AK, Espin J. Personalised medicine as a challenge for public pricing and reimbursement authorities - A survey among 27 European countries on the example of trastuzumab. *Health policy (Amsterdam, Netherlands)*. 2013;113(3):313-22. Epub 2014/01/11. PubMed PMID: 24409503.

Li A, Bozdag S, Kotliarov Y, Fine HA. GliomaPredict: a clinically useful tool for assigning glioma patients to specific molecular subtypes. *BMC medical informatics and decision making*. 2010;10:38. Epub 2010/07/17. doi: 10.1186/1472-6947-10-38. PubMed PMID: 20633285; PubMed Central PMCID: PMC2912783.

Lieb W, Volzke H, Pulley JM, Roden DM, Kroemer HK. Strategies for personalized medicine-based research and implementation in the clinical workflow. *Clinical pharmacology and therapeutics*. 2012;92(4):443-5. Epub 2012/08/23. doi: 10.1038/clpt.2012.119. PubMed PMID: 22910438.

Lin BK, Edelman E, McInerney JD, O'Leary J, Edelson V, Hughes KS, et al. Personalizing prenatal care using family health history: Identifying a panel of conditions for a novel electronic genetic screening tool. *Personalized Medicine*. 2013;10(3):307-18. doi: <http://dx.doi.org/10.2217/pme.13.18>. PubMed PMID: 2013300045.

Linardou H, Briasoulis E, Dahabreh IJ, Mountzios G, Papadimitriou C, Papadopoulos S, et al. All about KRAS for clinical oncology practice: gene profile, clinical implications and laboratory recommendations for somatic mutational testing in colorectal cancer. *Cancer treatment reviews*. 2011;37(3):221-33. Epub 2010/09/08. doi: 10.1016/j.ctrv.2010.07.008. PubMed PMID: 20817364.

Li-Pook-Tham J, Snyder M. iPOP goes the world: integrated personalized Omics profiling and the road toward improved health care. *Chemistry & biology*. 2013;20(5):660-6. Epub 2013/05/28. doi: 10.1016/j.chembiol.2013.05.001. PubMed PMID: 23706632.

Litton G, Kane D, Clay G, Kruger P, Belnap T, Parkinson B. Multidisciplinary cancer care with a patient and physician satisfaction focus. *Journal of oncology practice / American Society of Clinical Oncology*. 2010;6(6):e35-7. Epub 2011/03/02. doi: 10.1200/jop.2010.000028. PubMed PMID: 21358949; PubMed Central PMCID: PMC2988677.

Lorenz M, Klemm M, Eidens M, Fleischer M, Weise A, Braun W, et al. Actionable nutrigenetics for genetically based diseases? a new critical path to P4 medicine. *Current Pharmacogenomics and Personalized Medicine*. 2013;11(2):167-80. doi: <http://dx.doi.org/10.2174/1875692111311020009>. PubMed PMID: 2013737688.

Love D, Stratton E, Stocum M. Best practices for companion diagnostic and therapeutic development: Translating between the stakeholders. *New Biotechnology*. 2012;29(6):689-94. doi: <http://dx.doi.org/10.1016/j.nbt.2012.06.005>. PubMed PMID: 2012503283.



MacDonald DJ, Blazer KR, Weitzel JN. Extending comprehensive cancer center expertise in clinical cancer genetics and genomics to diverse communities: the power of partnership. *Journal of the National Comprehensive Cancer Network : JNCCN*. 2010;8(5):615-24. Epub 2010/05/25. PubMed PMID: 20495088; PubMed Central PMCID: PMC3299537.

Mascarin M, Truccolo I, Byther E, Capone D, Elia C. Cancer, Adolescence, and Their Peers: "They'll give you a Story". *Journal of cancer education : the official journal of the American Association for Cancer Education*. 2014. Epub 2014/03/19. doi: 10.1007/s13187-014-0635-9. PubMed PMID: 24633726.

McClure JB, Swan GE, St John J, Fauver R, Javitz HS, Bergen AW, et al. Pharmacogenetic smoking cessation intervention in a health care setting: a pilot feasibility study. *Nicotine & tobacco research : official journal of the Society for Research on Nicotine and Tobacco*. 2013;15(2):518-26. Epub 2012/09/06. doi: 10.1093/ntr/nts173. PubMed PMID: 22949583; PubMed Central PMCID: PMC3611995.

Meckley LM, Neumann PJ. Personalized medicine: factors influencing reimbursement. *Health policy (Amsterdam, Netherlands)*. 2010;94(2):91-100. Epub 2009/10/10. doi: 10.1016/j.healthpol.2009.09.006. PubMed PMID: 19815307.

Meier RJ. A critique of race-based and genomic medicine. *Collegium antropologicum*. 2012;36(1):5-10. Epub 2012/07/24. PubMed PMID: 22816192.

Meric-Bernstam F, Farhangfar C, Mendelsohn J, Mills GB. Building a personalized medicine infrastructure at a major cancer center. *Journal of clinical oncology : official journal of the American Society of Clinical Oncology*. 2013;31(15):1849-57. Epub 2013/04/17. doi: 10.1200/jco.2012.45.3043. PubMed PMID: 23589548.

Merlin T, Farah C, Schubert C, Mitchell A, Hiller JE, Ryan P. Assessing personalized medicines in Australia: a national framework for reviewing codependent technologies. *Medical decision making : an international journal of the Society for Medical Decision Making*. 2013;33(3):333-42. Epub 2012/08/17. doi: 10.1177/0272989x12452341. PubMed PMID: 22895559; PubMed Central PMCID: PMC3757917.

Mini E, Nobili S. Pharmacogenetics: implementing personalized medicine. *Clinical cases in mineral and bone metabolism : the official journal of the Italian Society of Osteoporosis, Mineral Metabolism, and Skeletal Diseases*. 2009;6(1):17-24. Epub 2009/01/01. PubMed PMID: 22461093; PubMed Central PMCID: PMC32781211.

Ng PC, Murray SS, Levy S, Venter JC. An agenda for personalized medicine. *Nature*. 2009;461(7265):724-6. Epub 2009/10/09. doi: 10.1038/461724a. PubMed PMID: 19812653.

Nishimura T, Kato H, Ikeda N, Kihara M, Nomura M, Kato Y, et al. Cancer Phenotype Diagnosis and Drug Efficacy within Japanese Health Care. *International journal of proteomics*. 2012;2012:921901. Epub 2012/06/12. doi: 10.1155/2012/921901. PubMed PMID: 22685658; PubMed Central PMCID: PMC3364583.

O'Donnell PH, Danahey K, Jacobs M, Wadhwa NR, Yuen S, Bush A, et al. Adoption of a clinical pharmacogenomics implementation program during outpatient care-initial results of the University of Chicago "1,200 Patients Project". *American journal of medical genetics Part C, Seminars in medical genetics*. 2014;166(1):68-75. Epub 2014/03/13. doi: 10.1002/ajmg.c.31385. PubMed PMID: 24616296.

Ong FS, Das K, Wang J, Vakil H, Kuo JZ, Blackwell WL, et al. Personalized medicine and pharmacogenetic biomarkers: progress in molecular oncology testing. *Expert review of molecular diagnostics*. 2012;12(6):593-602. Epub 2012/08/01. doi: 10.1586/erm.12.59. PubMed PMID: 22845480; PubMed Central PMCID: PMC3495985.

O'Rawe JA, Fang H, Ryneerson S, Robison R, Kiruluta ES, Higgins G, et al. Integrating precision medicine in the study and clinical treatment of a severely mentally ill person. *PeerJ*. 2013;1:e177. Epub 2013/10/11. doi: 10.7717/peerj.177. PubMed PMID: 24109560; PubMed Central PMCID: PMC3792182.

Orlando LA, Hauser ER, Christianson C, Powell KP, Buchanan AH, Chesnut B, et al. Protocol for implementation of family health history collection and decision support into primary care using a computerized family health history system. *BMC health services research*. 2011;11:264. Epub 2011/10/13. doi: 10.1186/1472-6963-11-264. PubMed PMID: 21989281; PubMed Central PMCID: PMC3200182.

Orlando LA, Henrich VC, Hauser ER, Wilson C, Ginsburg GS. The genomic medicine model: An integrated approach to implementation of family health history in primary care. *Personalized Medicine*. 2013;10(3):295-306. doi: <http://dx.doi.org/10.2217/pme.13.20>. PubMed PMID: 2013300047.

Orlando LA, Wu RR, Beadles C, Himmel T, Buchanan AH, Powell KP, et al. Implementing family health history risk stratification in primary care: Impact of guideline criteria on populations and resource demand. *American journal of medical genetics Part C, Seminars in medical genetics*. 2014;166(1):24-33. Epub 2014/03/13. doi: 10.1002/ajmg.c.31388. PubMed PMID: 24616329.

Ou SH, Bartlett CH, Mino-Kenudson M, Cui J, Iafrate AJ. Crizotinib for the treatment of ALK-rearranged non-small cell lung cancer: a success story to usher in the second decade of molecular targeted therapy in oncology. *The oncologist*. 2012;17(11):1351-75. Epub 2012/09/20. doi: 10.1634/theoncologist.2012-0311. PubMed PMID: 22989574; PubMed Central PMCID: PMC3500356.

Overby CL, Erwin AL, Abul-Husn NS, Ellis SB, Scott SA, Obeng AO, et al. Physician attitudes toward adopting genome-guided prescribing through clinical decision support. *Journal of Personalized Medicine*. 2014;4(1):35-49. doi: <http://dx.doi.org/10.3390/jpm4010035>. PubMed PMID: 2014167780.

Overby CL, Tarczy-Hornoch P, Hoath JI, Kalet IJ, Veenstra DL. Feasibility of incorporating genomic knowledge into electronic medical records for pharmacogenomic clinical decision support. *BMC bioinformatics*. 2010;11 Suppl 9:S10. Epub 2010/11/10. doi: 10.1186/1471-2105-11-s9-s10. PubMed PMID: 21044357; PubMed Central PMCID: PMC32967740.

Palmer JE. Genetic gatekeepers: regulating direct-to-consumer genomic services in an era of participatory medicine. *Food and drug law journal*. 2012;67(4):475-524, iii. Epub 2012/01/01. PubMed PMID: 24640618.

Patel CJ, Sivadas A, Tabassum R, Preeprem T, Zhao J, Arafat D, et al. Whole genome sequencing in support of wellness and health maintenance. *Genome medicine*. 2013;5(6):58. Epub 2013/06/29. doi: 10.1186/gm462. PubMed PMID: 23806097.

Phillips KA. The intersection of biotechnology and pharmacogenomics: health policy implications. *Health affairs (Project Hope)*. 2006;25(5):1271-80. Epub 2006/09/13. doi: 10.1377/hlthaff.25.5.1271. PubMed PMID: 16966723.

Phillips KA, Liang SY, Van Bebber S. Challenges to the translation of genomic information into clinical practice and health policy: Utilization, preferences and economic value. *Current opinion in molecular therapeutics*. 2008;10(3):260-6. Epub 2008/06/07. PubMed PMID: 18535933; PubMed Central PMCID: PMC2910510.

Piatkov I, Jones T, Rochester C. Cytochrome P450 loss-of-function polymorphism genotyping on the Agilent Bioanalyzer and clinical application. *Pharmacogenomics*. 2009;10(12):1987-94. Epub 2009/12/05. doi: 10.2217/pgs.09.127. PubMed PMID: 19958097.

Platt D. When consumers get their genomes. *Personalized Medicine*. 2009;6(6):669-79. doi: <http://dx.doi.org/10.2217/pme.09.50>. PubMed PMID: 2009654717.

Poh N, de Lusignan S. Data-modelling and visualisation in chronic kidney disease (CKD): a step towards personalised medicine. *Informatics in primary care*. 2011;19(2):57-63. Epub 2011/01/01. PubMed PMID: 22417815.

Printz C. Universities bring personalized medicine to the forefront of patient care: two programs aim to make customized treatments easily accessible. *Cancer*. 2012;118(10):2563-4. Epub 2012/05/05. doi: 10.1002/cncr.27600. PubMed PMID: 22555671.

Pulley JM, Denny JC, Peterson JF, Bernard GR, Vnencak-Jones CL, Ramirez AH, et al. Operational implementation of prospective genotyping for personalized medicine: the design of the Vanderbilt PREDICT project. *Clinical pharmacology and therapeutics*. 2012;92(1):87-95. Epub 2012/05/17. doi: 10.1038/clpt.2011.371. PubMed PMID: 22588608; PubMed Central PMCID: PMC3581305.

Richards M. Reading the runes of my genome: A personal exploration of retail genetics. *New Genetics and Society*. 2010;29(3):291-310. doi: <http://dx.doi.org/10.1080/14636778.2010.507486>. PubMed PMID: 2010514376.

Ritchie MD. The success of pharmacogenomics in moving genetic association studies from bench to bedside: study design and implementation of precision medicine in the post-GWAS era. *Human genetics*. 2012;131(10):1615-26. Epub 2012/08/28. doi: 10.1007/s00439-012-1221-z. PubMed PMID: 22923055; PubMed Central PMCID: PMC3432217.

Rosenbloom ST, Daniels TL, Talbot TR, McClain T, Hennes R, Stenner S, et al. Triaging patients at risk of influenza using a patient portal. *Journal of the American Medical Informatics Association : JAMIA*. 2012;19(4):549-54. Epub 2011/12/06. doi: 10.1136/amiainl-2011-000382. PubMed PMID: 22140208; PubMed Central PMCID: PMC3384102.

Roychowdhury S, Iyer MK, Robinson DR, Lonigro RJ, Wu Y-M, Cao X, et al. Personalized Oncology Through Integrative High-Throughput Sequencing: A Pilot Study. *Science Translational Medicine*. 2011;3(111):111ra21. doi: 10.1126/scitranslmed.3003161.

Ruddy KJ, Desantis SD, Gelman RS, Wu AH, Punglia RS, Mayer EL, et al. Personalized medicine in breast cancer: tamoxifen, endoxifen, and CYP2D6 in clinical practice. *Breast cancer research and treatment*. 2013;141(3):421-7. Epub 2013/09/26. doi: 10.1007/s10549-013-2700-1. PubMed PMID: 24062210.

Schmidlen TJ, Wawak L, Kasper R, Garcia-Espana JF, Christman MF, Gordon ES. Personalized Genomic Results: Analysis of Informational Needs. *Journal of genetic counseling*. 2014. Epub 2014/02/04. doi: 10.1007/s10897-014-9693-8. PubMed PMID: 24488620.

Shackelford RE, Whitling NA, McNab P, Japa S, Coppola D. KRAS Testing: A Tool for the Implementation of Personalized Medicine. *Genes & cancer*. 2012;3(7-8):459-66. Epub 2012/12/25. doi: 10.1177/1947601912460547. PubMed PMID: 23264846; PubMed Central PMCID: PMC3527988.

Smarr L. Quantifying your body: a how-to guide from a systems biology perspective. *Biotechnology journal*. 2012;7(8):980-91. Epub 2012/08/14. doi: 10.1002/biot.201100495. PubMed PMID: 22887886.

Sohn S, Helms TM, Pelleter JT, Muller A, Krottinger AI, Schoffski O. Costs and benefits of personalized healthcare for patients with chronic heart failure in the care and education program "Telemedicine for the Heart". *Telemedicine journal and e-health : the official journal of the American Telemedicine Association*. 2012;18(3):198-204. Epub 2012/02/24. doi: 10.1089/tmj.2011.0134. PubMed PMID: 22356529.

Sorich MJ, McKinnon RA. Personalized medicine: potential, barriers and contemporary issues. *Current drug metabolism*. 2012;13(7):1000-6. Epub 2012/05/18. PubMed PMID: 22591350.

Sottas PE, Robinson N, Rabin O, Saugy M. The athlete biological passport. *Clinical chemistry*. 2011;57(7):969-76. Epub 2011/05/21. doi: 10.1373/clinchem.2011.162271. PubMed PMID: 21596947.

Stack CB, Gharani N, Gordon ES, Schmidlen T, Christman MF, Keller MA. Genetic risk estimation in the Coriell Personalized Medicine Collaborative. *Genetics in medicine : official journal of the American College of Medical Genetics*. 2011;13(2):131-9. Epub 2011/01/15. doi: 10.1097/GIM.0b013e318201164c. PubMed PMID: 21233721.

Su CJ, Chiang CY. IAServ: an intelligent home care web services platform in a cloud for aging-in-place. *International journal of environmental research and public health*. 2013;10(11):6106-30. Epub 2013/11/15. doi: 10.3390/ijerph10116106. PubMed PMID: 24225647; PubMed Central PMCID: PMC3863890.

Sullivan SD, Garrison LP, Jr., Rinde H, Kolberg J, Moler EJ. Cost-effectiveness of risk stratification for preventing type 2 diabetes using a multi-marker diabetes risk score. *Journal of medical economics*. 2011;14(5):609-16. Epub 2011/07/12. doi: 10.3111/13696998.2011.602160. PubMed PMID: 21740291.

Sweet K, Gordon ES, Sturm AC, Schmidlen TJ, Manickam K, Tol AE, et al. Design and implementation of a randomized controlled trial of genomic counseling for patients with chronic disease. *Journal of Personalized Medicine*. 2014;4(1):1-19. doi: <http://dx.doi.org/10.3390/jpm4010001>. PubMed PMID: 2014032499.

Tenenbaum JD, James A, Paulyson-Nunez K. An altered treatment plan based on direct to consumer (DTC) genetic testing: Personalized medicine from the patient/pin-cushion perspective. *Journal of Personalized Medicine*. 2012;2(4):192-200. doi: <http://dx.doi.org/10.3390/jpm2040192>. PubMed PMID: 2013123732.

Teng K, Eng C, Hess CA, Holt MA, Moran RT, Sharp RR, et al. Building an innovative model for personalized healthcare. *Cleveland Clinic journal of medicine*. 2012;79 Suppl 1:S1-9. Epub 2012/04/18. doi: 10.3949/ccjm.79.s1.01. PubMed PMID: 22492701.

Thompson R. Developing and marketing a women's health Web site. *HealthlyMe.md* seeks to provide personalized health care over the Internet. *Marketing health services*. 2000;20(3):42-4. Epub 2001/02/24. PubMed PMID: 11185875.

Topol EJ, Lauer MS. The rudimentary phase of personalised medicine: coronary risk scores. *Lancet*. 2003;362(9398):1776-7. Epub 2003/12/05. doi: 10.1016/s0140-6736(03)14941-0. PubMed PMID: 14654312.

Towse A, Ossa D, Veenstra D, Carlson J, Garrison L. Understanding the economic value of molecular diagnostic tests: Case studies and lessons learned. *Journal of Personalized Medicine*. 2013;3(4):288-305. doi: <http://dx.doi.org/10.3390/jpm3040288>. PubMed PMID: 2013739645.

Trosman JR, Van Bebber SL, Phillips KA. Coverage policy development for personalized medicine: private payer perspectives on developing policy for the 21-gene assay. *Journal of oncology practice / American Society of Clinical Oncology*. 2010;6(5):238-42. Epub 2011/01/05. doi: 10.1200/jop.000075. PubMed PMID: 21197187; PubMed Central PMCID: PMCPMC2936466.

Vaiopoulou A, Gazouli M, Karikas GA. Pharmacogenomics: current applications and future prospects towards personalized therapeutics. *Journal of BUON : official journal of the Balkan Union of Oncology*. 2013;18(3):570-8. Epub 2013/09/26. PubMed PMID: 24065466.

Van Allen EM, Foye A, Wagle N, Kim W, Carter SL, McKenna A, et al. Successful whole-exome sequencing from a prostate cancer bone metastasis biopsy. *Prostate Cancer and Prostatic Diseases*. 2014;17(1):23-7. doi: <http://dx.doi.org/10.1038/pcan.2013.37>. PubMed PMID: 2014120671.

van't Veer LJ, Bernards R. Enabling personalized cancer medicine through analysis of gene-expression patterns. *Nature*. 2008;452(7187):564-70. Epub 2008/04/04. doi: 10.1038/nature06915. PubMed PMID: 18385730.

Vizirianakis IS. Improving pharmacotherapy outcomes by pharmacogenomics: from expectation to reality? *Pharmacogenomics*. 2005;6(7):701-11. Epub 2005/10/07. doi: 10.2217/14622416.6.7.701. PubMed PMID: 16207147.

Vorderstrasse AA, Ginsburg GS, Kraus WE, Maldonado MC, Wolever RQ. Health coaching and genomics-potential avenues to elicit behavior change in those at risk for chronic disease: protocol for personalized medicine effectiveness study in air force primary care. *Global advances in health and medicine : improving healthcare outcomes worldwide*. 2013;2(3):26-38. Epub 2014/01/15. doi: 10.7453/gahmj.2013.035. PubMed PMID: 24416670; PubMed Central PMCID: PMCPMC3833533.

Wac K. Smartphone as a personal, pervasive health informatics services platform: literature review. *Yearbook of medical informatics*. 2012;7(1):83-93. Epub 2012/08/15. PubMed PMID: 22890347.

Wang XL, Gui Q, Liu BW, Jin ZP, Chen Y. Enabling Smart Personalized Healthcare: A Hybrid Mobile-Cloud Approach for ECG Telemonitoring. *IEEE journal of biomedical and health informatics*. 2014 May;18(3):739-45. PubMed PMID: WOS:000336050400004.

Wang YD, Phillips-Wren G, Forgionne G. E-delivery of personalised healthcare information to intermediaries for suicide prevention. *International journal of electronic healthcare*. 2005;1(4):396-412. Epub 2007/12/01. PubMed PMID: 18048226.

Waring PM. Matching patients with drugs: Triumphs and challenges. *Personalized Medicine*. 2006;3(3):335-44. doi: <http://dx.doi.org/10.2217/17410541.3.3.335>. PubMed PMID: 2006393826.

Weitzel KW, Eelsey AR, Langaee TY, Burkley B, Nessel DR, Obeng AO, et al. Clinical pharmacogenetics implementation: Approaches, successes, and challenges. *American journal of medical genetics Part C, Seminars in medical genetics*. 2014;166(1):56-67. Epub 2014/03/13. doi: 10.1002/ajmg.c.31390. PubMed PMID: 24616371.

Weldon CB, Trosman JR, Gradishar WJ, Benson AB, 3rd, Schink JC. Barriers to the use of personalized medicine in breast cancer. *Journal of oncology practice / American Society of Clinical Oncology*. 2012;8(4):e24-31. Epub 2012/11/28. doi: 10.1200/jop.2011.000448. PubMed PMID: 23180995; PubMed Central PMCID: PMCPMC3396824.
